1            ***MafK mediates chromatin remodeling to silence IRF8 expression in***  
2                                                    ***non-immune cells in a lineage-specific manner***

3

4

5    Nitsan Fourier<sup>1</sup>, Maya Zolty<sup>1</sup>, Aviva Azriel<sup>1</sup>, Donato Tedesco<sup>2</sup>, and Ben-Zion Levi<sup>1\*</sup>

6

7    <sup>1</sup>Department of Biotechnology and Food Engineering, Technion - Israel Institute of  
8    Technology, Haifa, Israel

9    <sup>2</sup>Collecta, Inc., Mountain View, California, United States of America

10

11

12    \*Corresponding Author:

13    E-mail: [blevi@technion.ac.il](mailto:blevi@technion.ac.il)

## 14 **Abstract**

15 The regulation of gene expression is a result of a complex interplay between chromatin  
16 remodeling, transcription factors (TFs) and signaling molecules. Cell differentiation is  
17 accompanied by chromatin remodeling of specific loci to permanently silence genes  
18 that are not essential for the differentiated cell activity. The molecular cues that recruit  
19 the chromatin remodeling machinery are not well characterized. IRF8 is an immune-  
20 cell specific TF, and thus, serves as a model gene to elucidate the molecular  
21 mechanisms governing its silencing in non-immune cells. A high-throughput shRNA  
22 library screen in IRF8 expression-restrictive cells enabled the identification of MafK as  
23 modulator of IRF8 silencing, affecting chromatin architecture. ChIP-seq analysis  
24 revealed three MafK binding-regions (-25kb, -20kb and IRF8 6<sup>th</sup> intron) in the IRF8  
25 locus. These MafK binding-sites are sufficient to repress a reporter-gene when cloned  
26 in genome-integrated lentiviral reporter constructs in expression-restrictive cells only.  
27 Conversely, plasmid-based constructs do not demonstrate such repressive effect. These  
28 results highlight the role of these MafK binding-sites in mediating repressed chromatin  
29 assembly. Furthermore, removal of MafK-int6 binding-region from BAC-IRF8 reporter  
30 construct was sufficient to promote accessible chromatin conformation. Taken together,  
31 we identified and characterized several MafK binding elements within the IRF8 locus  
32 that mediate repressive chromatin conformation resulting in the silencing of IRF8  
33 expression only in non-immune cells.

34

## 35 **Introduction**

36 The regulation of gene expression is not a linear process, but a result of a complex  
37 interplay between chromatin modifications, transcription factors (TFs) and signaling  
38 molecules. Collectively, this interplay contributes to cell differentiation, maintenance  
39 of cell identity, and appropriate responses to the changing environment. Chromatin  
40 architecture governs DNA accessibility and, therefore, has a crucial function in  
41 establishing, maintaining, and propagating distinct gene expression patterns. Chromatin  
42 organization is regulated in part by a complex array of histones post-translational  
43 modifications (PTMs), known as the ‘histone code’ (1). Genome-wide studies of such  
44 modifications highlighted the correlation of some specific modifications with gene  
45 activity. For example, tri-methylation of Histone H3 lysine 27 (H3K27me3) and  
46 H3K9me and are associated with repressed chromatin state. In contrast, H3K4me1-3  
47 and histone acetylation (H3ac and H4ac) are associated with transcriptionally active  
48 chromatin regions (2). Among the factors that affect the epigenome dynamics are TFs  
49 that interact with chromatin and chromatin-modifying enzymes, such as the Polycomb  
50 group (PcG) complexes. TFs must gain access to their binding-sites within a chromatin  
51 context. However, once bound to DNA, TFs can also modify the chromatin landscape  
52 (3).

53 During the course of cell lineage-specification, cellular gene expression programs need  
54 to be adapted to specify the differentiated-cell new identity. Differentiation is  
55 accompanied by dynamic changes in chromatin states (4). One of the most studied  
56 processes is the differentiation of hematopoietic cells, in which all blood cell-types arise  
57 from hematopoietic stem cells (HSCs) through balanced self-renewal and  
58 differentiation, and give rise to all mature blood cells. During differentiation, the  
59 transcription of genes that are normally expressed in other lineages are often actively  
60 suppressed; a crucial but mechanistically not-well characterized hallmark of lineage-  
61 instructive TFs (5). One such example is the myeloid TF Interferon Regulatory Factor  
62 8 (IRF8), which plays a key role in myelopoiesis and maintaining the critical balance  
63 of the major myeloid subsets (6). Additionally, IRF8 is part of a regulatory complex  
64 involved in specification and commitment to B-cell development (7) and controls T-  
65 cells functions and activities (8, 9). Aberrant expression of this Interferon- $\gamma$  (IFN $\gamma$ )-  
66 induced gene (10) is associated with skewed differentiation, which is accompanied by  
67 myeloleukemias (11-13). While much is known about the essential mechanisms for its

68 hematopoietic-specific expression, IRF8 silencing in non-immune cells is still  
69 uncharacterized. Recently we demonstrated that IRF8 3<sup>rd</sup> intron controls IRF8 silencing  
70 only in non-immune cells (14). This defined element is necessary and sufficient to  
71 silence homologous and heterologous gene expression in restrictive cells and possibly  
72 acts as a nucleation-core for chromatin remodeling in these cells. Here, we extended  
73 our observation using a high-throughput shRNA library screen (15) in IRF8 expression-  
74 restrictive cells that enabled the identification of MafK as an IRF8 repressor. MafK  
75 belongs to the small Maf (musculoaponeurotic fibrosarcoma) protein family (sMafs),  
76 which has vital roles in stress signaling, hematopoiesis, central nervous system function  
77 and oncogenesis (16). sMafs can form either homodimers and act as transcriptional  
78 repressors (17) or form heterodimers with TFs such as basic leucine zipper (bZIP)  
79 proteins and act as repressors or activators, depending on their interacting partner (18,  
80 19). These hetero-complexes bind to Maf response elements (MAREs) (18, 20).  
81 Additionally, sMafs form complexes with chromatin modifiers, such as the PcG  
82 complexes (21), leading to chromatin remodeling and transcriptional activation or  
83 repression. Here, we have identified three MafK binding-regions within the IRF8 locus,  
84 -25kb, -20kb and IRF8 6<sup>th</sup> intron, which are sufficient to exert cell-type specific  
85 chromatin remodeling even in a random genomic context. Moreover, MafK binding-  
86 region in IRF8 6<sup>th</sup> intron acts as repressive element, affecting the histone PTM signature  
87 in the region, and its deletion leads to an open chromatin configuration.

88

## 89 **Results**

### 90 **High-throughput screening for identifying IRF8 regulator in non-hematopoietic** 91 **cells**

92 In search of the molecular factors mediating cell-type specific IRF8 silencing, we  
93 employed the DECIPHER pooled barcoded lentiviral shRNA libraries, with 5-6  
94 shRNA constructs targeting each of the 9,200 mouse genes (illustrated in Fig. 1a) (15).  
95 In brief, this library was transduced to IRF8 expression-restrictive cell-line, and cells  
96 harboring shRNAs that led to an increase in IRF8 expression above base-line level,  
97 were sorted by FACS and the shRNA construct targeting each cell was identified by its  
98 barcode using next generation sequencing (NGS). Specifically, This lentiviral library  
99 was transduced to the IRF8 reporter cell-line, NIH3T3, harboring BAC-IRF8.1-GFP

100 construct (NIH3T3-IRF8.1) (14). This genome-integrated BAC harbors 219,907bp  
101 encompassing the entire murine IRF8 locus. The BAC-IRF8.1 reporter construct was  
102 generated by inserting a reporter cassette containing a fluorescent reporter-gene and an  
103 independently transcribed selectable marker at the IRF8 translation start site. This  
104 reporter construct authentically reports on IRF8 lineage restrictive-expression in  
105 response to IFN $\gamma$  stimulation; fluorescent in IRF8 expression-permissive macrophage  
106 cells and dark in expression-restrictive cells, such as NIH3T3 (murine fibroblast) (14).  
107 Following selection for lentiviral transduced cells, the most fluorescent cells were  
108 enriched by FACS (top 5%) and as a control, non-fluorescent cells (lower 50%) were  
109 collected. Genomic DNA was subjected to high-throughput sequencing to identify the  
110 barcode of the integrated shRNAs that were statistically enriched in comparison to the  
111 control (Fig. 1b). The final candidates list (Fig. 1c) revealed an over-representation of  
112 nuclear proteins (about 50% of the hits), of which close to 30% were TFs (MafK, Fhl2  
113 and Ldb1), further validating our screening approach. Interestingly, the ENCODE  
114 database (22) reveals MafK binding in the human IRF8 4<sup>th</sup> intron (S1 Fig). Additionally,  
115 the murine IRF8 3<sup>rd</sup> intron regulatory element has an *in-silico* predicted MafK DNA  
116 binding motif (MatInspector (23)). Together, this placed MafK as our prime candidate  
117 for further study.

118

119 **Fig 1. shRNA library screen identifies IRF8 repressor candidates in expression-**  
120 **restrictive cells**

121 (a) Schematic illustration of the DECIPHER shRNA library screen. (b) Scatterplot of  
122 number of sequencing reads of each shRNA construct in the GFP<sup>high</sup> population (y axis)  
123 relative to the number of reads in the control GFP<sup>low</sup> population (x axis) in a  
124 representative experiment. For each shRNA construct an enrichment score (the fold-  
125 ratio between the sequencing reads in the GFP<sup>high</sup> population relative to control  
126 population) was calculated. shRNA constructs exhibiting enrichment score >1.5 are  
127 marked in blue and constructs with enrichment score <1.5 are marked in green. shRNA  
128 constructs targeting MafK are marked in black squares. (c) The screen was performed  
129 in three replicates and an enrichment score was calculated for each gene, according to  
130 the mean score of its shRNA constructs. The table presents the mean $\pm$ AvDev fold  
131 enrichment of the final candidates, which had more than 1.9-fold enrichment score in  
132 at least two shRNA constructs for each gene, in all three replicates. The gene candidates

133 were grouped according to their cellular localization annotation. Bold text represents  
134 transcription factors. Actin is presented as negative control.

135

### 136 **MafK mediates IRF8 repression in non-hematopoietic cell-line**

137 To validate MafK as IRF8 repressor, MafK was knocked-down (KD) in NIH3T3-  
138 IRF8.1 reporter cell-line and the effect on the IRF8-GFP reporter-gene and endogenous  
139 IRF8 expression was evaluated by FACS analysis. MafK KD was very effective (down  
140 70%, Fig. 2a) and led to a significant GFP reporter alleviation in IRF8 expression-  
141 restrictive NIH3T3-IRF8.1 cells (2.5-fold, Fig. 2b, black bars). Moreover,  
142 immunostaining of endogenous IRF8 revealed alleviation of IRF8 expression by more  
143 than 2-fold following MafK KD, as evident by FACS analysis (Fig. 2b, grey bars).  
144 Furthermore, this FACS analysis clearly demonstrated that in the majority of this cell  
145 population, when the reporter-gene expression was alleviated a concomitant alleviation  
146 in IRF8 expression was observed (Fig. 2c, right panel), pointing to a direct correlation  
147 between GFP reporter-gene expression and endogenous IRF8 expression. Thus, MafK  
148 is directly linked to IRF8 repression in restrictive non-hematopoietic cells.

149

150 **Fig 2. MafK KD is sufficient to alleviate GFP reporter-gene and endogenous IRF8**  
151 **expression in restrictive NIH3T3 cells.** MafK KD was achieved by infecting NIH3T3-  
152 IRF8.1 cells with lentiviral vector harboring shMafK or pLKO.1 empty-vector as  
153 control. (a) MafK expression level was measured using real-time qRT-PCR. Graph  
154 represents mean $\pm$ AvDev. (b) The cells were immunostained using fluorescence-labeled  
155 anti-IRF8 antibodies, and subsequently GFP and endogenous IRF8 expression levels  
156 were determined by FACS analysis. Graph represents mean $\pm$ AvDev of relative GFP  
157 (black) and IRF8 (grey) mean fluorescence intensity (MFI) in MafK KD cells. Control  
158 cells were determined as 1. (c) Representative FACS dot-plots presenting GFP (x-axis)  
159 and IRF8 (y-axis) expression of control (left) and MafK KD (right) NIH3T3-IRF8.1  
160 cells. Red squares represent GFP<sup>high</sup>/IRF8<sup>high</sup> expressing-cells and their percentage of  
161 the total population. \*p-value<0.05, \*\*p-value<0.01, student's t-test, n=3.

162

163 To identify the binding sites of MafK within the IRF8 locus, ChIP-Seq analyses were  
164 performed in IRF8 expression-restrictive cells (NIH3T3) and IRF8 expression

165 permissive cells (RAW 264.7 (RAW)– murine macrophage cell-line). MafK ChIP-Seq  
166 data revealed three distinct binding-sites in IRF8 locus in NIH3T3 and RAW cells (Fig.  
167 3a, black and grey tracks, respectively). IRF8-restrictive (NIH3T3) and permissive cells  
168 (RAW) exhibit similar MafK binding patterns; with peaks at -25 kb and -20 kb upstream  
169 to IRF8 transcription start site (TSS) and within the IRF8 6<sup>th</sup> intron (MafK25, MafK20  
170 and MafK-int6, respectively). While differential binding pattern between restrictive and  
171 permissive cells was expected, the results reflects the reported MafK dual activity, as  
172 an activator or repressor, depending on its interacting partner (16, 18, 20). A JASPAR  
173 database search (24) predicts MafK DNA binding motifs with varying affinity scores  
174 in each of the ChIP-Seq binding-regions. The ChIP-Seq data was further validated by  
175 ChIP-PCR, enriching MafK bound DNA from the above-mentioned three binding-sites  
176 (S2 Fig). Although MafK binding profile revealed similar MafK occupancy in NIH3T3  
177 and RAW cells, differential enrichment analysis (Fig. 3b) revealed highly significant  
178 (p-value of  $7 \cdot 10^{-11}$ ) 4-fold MafK binding enrichment in the -25 kb region in RAW cells  
179 in comparison to NIH3T3 cells. The -20 kb region also exhibited significant 2-fold  
180 enrichment (p-value of  $9 \cdot 10^{-5}$ ) in RAW cells, while IRF8-int6 showed no differential  
181 enrichment. The significant difference in MafK binding, favoring IRF8 expression-  
182 permissive cells, suggests that MafK25 and MafK20 sites act as activators. In order to  
183 extend these results, the regulatory functionality of each binding-region was further  
184 investigated using various reporter assay systems, as discussed hereafter.

185

186 **Fig 3. MafK binding profile in IRF8 locus in IRF8 expression-restrictive and**  
187 **permissive cells.** (a) Representative tracks from RAW (top, black track) and NIH3T3  
188 (bottom, grey track) MafK ChIP-seq. Black rectangular represent three MafK binding-  
189 regions: -25 kb and -20 kb upstream to IRF8 TSS and IRF8 6th intron. (b) Differential  
190 enrichment analysis of MafK binding-regions in RAW vs NIH3T3 cells. Graph presents  
191 fold difference of RAW/NIH3T3 calculated from three replicates. p-value of each ratio  
192 is also given.

193

194 MafK was reported as an interacting factor with chromatin-modifying complexes  
195 leading to repressed chromatin conformation (21, 25). Thus, the involvement of MafK  
196 in mediating repressed chromatin, characterized with enriched H3K27me3 deposition,  
197 was examined at the IRF8 locus. To this end, H3K27me3 ChIP-qPCR was performed

198 on NIH3T3-IRF8.1 cells that were KD for MafK. As evident in Fig. 2, effective KD  
199 was accompanied by elevated GFP reporter-gene and endogenous IRF8 expression.  
200 Thus, cells were FACS-sorted according to their GFP expression and ChIP-qPCR for  
201 H3K27me3 modification was performed on the GFP<sup>high</sup> population (effective MafK  
202 KD) and GFP<sup>low</sup> population (non-effective MafK KD), as control. H3K27me3 ChIP-  
203 qPCR demonstrated that MafK KD was accompanied by a significant decrease in  
204 H3K27me3 repressive modification over the reporter-gene (Fig. 4a) as well as over the  
205 endogenous IRF8 (Fig. 4b), resulting in a less-condensed chromatin conformation  
206 accompanied by alleviation of gene expression (Fig. 2b). These results underscore the  
207 effect of MafK on chromatin remodeling, as evident by H3K27me3 deposition, as part  
208 of its regulatory mechanism in silencing IRF8.

209

210 **Fig 4. MafK affects deposition of repressive H3K27me3 PTM over IRF8 locus.**

211 NIH3T3-IRF8.1 cells were infected with shMafK lentiviral vector or pLKO.1 empty-  
212 vector as control. Infected cells were sorted using FACS, according to GFP expression,  
213 into MafK KD (GFP<sup>high</sup>) and control cells (GFP<sup>low</sup>) and subjected to H3K27me3  
214 modification ChIP-qPCR using primers targeting either the GFP reporter-gene (a) or  
215 the endogenous IRF8 (b). Graph represents the normalized fold enrichment ratio of Ab  
216 enrichment vs non-specific IgG Ab. \* p-value<0.05, \*\*p-value<0.01 student's t-test,  
217 n=2.

218

219 To further delineate the role of Mafk in silencing IRF8 in expression-restrictive cells in  
220 comparison to expression-permissive cells, we investigated the effect of each binding-  
221 region (MafK25, MafK20 and MafK-int6) on the IRF8 promoter in a reporter gene  
222 assays. On one hand, MafK may act as a transcriptional repressor or activator (16, 18,  
223 20), depending upon its interacting partner. On the other hand, MafK recruits chromatin  
224 modifiers that may render the IRF8 locus accessible or inaccessible to the  
225 transcriptional machinery (21, 25) in a cell-type specific manner. Luciferase reporter  
226 assays were performed employing two strategies that may shed light on the mode of  
227 MafK action on IRF8 expression in restrictive or permissive cells. In the first strategy,  
228 we used transiently expressed Luciferase reporter cassettes cloned in a plasmid (pGL3,  
229 see illustration in Fig. 5a), which does not integrate into the genome and thus does not  
230 assemble chromatin conformation (26). Therefore, this type of assay allows to



231 determine the direct effect of TFs interacting with MafK binding-sites, regardless of  
232 chromatin state. In the second strategy, we used the same reporter cassettes cloned in a  
233 retroviral vector, (pMSCV, Fig. 5a). This retroviral vector randomly integrates into  
234 infected cell genome and assembles chromatin conformation. Consequently, the  
235 chromatin environment effects on the reporter-gene expression. In this reporter system  
236 the effect of each MafK binding-site on chromatin assembly is measured. Thus, these  
237 two reporter systems may point to different regulatory mechanisms. Specifically, each  
238 of MafK binding-regions was PCR-amplified and cloned upstream to IRF8 promoter  
239 driving the expression of the Luciferase reporter-gene and subsequently cloned to the  
240 plasmid pGL3 or to the retroviral vector pMSCV (as illustrated in Fig. 5a). These  
241 reporter constructs, as well as control empty-vector, were transfected/infected to  
242 NIH3T3 cells (IRF8 expression-restrictive cells) and to RAW cells (IRF8 expression-  
243 permissive) and Luciferase levels were measured. No change in reporter-gene activity,  
244 in either of MafK reporter constructs, was observed when using the transient Luciferase  
245 reporter plasmid system in expression-restrictive NIH3T3 cells (Fig. 5b, left panel).  
246 Similarly, only minor changes in Luciferase levels were noted when using the transient  
247 reporter system in IRF8-permissive RAW cells; while MafK25 region exhibited slight  
248 reduction in reporter activity, MafK-int6 exhibited slight increase in reporter activity  
249 (Fig. 5b, right panel). Conversely, Luciferase activity was significantly reduced with  
250 all reporter constructs when using the retroviral Luciferase system **only** in expression-  
251 restrictive cells (~65%, compare Fig. 5c, left and right panels). It is clear that in  
252 expression-permissive cells reporter-gene activity was not reduced when using the  
253 retroviral reporter system. On the contrary, MafK25 and MafK20 regions exhibited  
254 increased reporter activity, albeit not statistically significant (Fig. 5c, right panel).  
255 Collectively, MafK binding-sites exhibit cell-type specific repression that probably  
256 reflects cell-type specific chromatin remodeling.

257

258 **Fig 5. MafK mediates chromatin remodeling in IRF8 locus in a cell-type specific**  
259 **manner.** (a) Illustration of MafK-Luciferase reporter constructs. pGL3 (plasmid) or  
260 pMSCV (retroviral) vectors were used as backbone to create MafK-Luciferase reporter  
261 constructs. MafK binding-regions located -25 kb (MafK25), -20 kb (MafK20) and  
262 IRF8int6 (MafK-int6) were each separately cloned upstream to IRF8 promoter. (b)  
263 Expression-restrictive NIH3T3 (left panel) and permissive RAW (right panel) were  
264 transfected with transient pGL3-IRF8p-Luc-MafK constructs. Transient Luciferase

265 activity was normalized to Rennilla luciferase activity and total protein amount. (c)  
266 Expression-restrictive NIH3T3 (left panel) and permissive RAW (right panel) were  
267 infected with retroviral vectors pMSCV-IRF8p-Luc-MafK . Retroviral Luciferase  
268 activity was normalized to vector genomic copy number, as determined using real-time  
269 qPCR, and total protein amount. Relative Luciferase activity was calculated as ratio  
270 between MafK construct activity and control (Luciferase empty-vector). \*p-  
271 value<0.05, student's t-test, n=3-4.

272

273 Next, Luciferase-MafK reporter experiments combined with MafK overexpression  
274 were conducted to directly link MafK to the silencing effect exerted by MafK binding-  
275 regions in NIH3T3. For that purpose NIH3T3 and RAW cells were transfected with the  
276 above-mentioned transient Luciferase-MafK reporter plasmids, together with pMSCV-  
277 MafK overexpression vector, and MafK overexpression was verified by real-time qPCR  
278 (**Error! Reference source not found.**). MafK overexpression in expression-restrictive  
279 NIH3T3 cells resulted in approximately 35% reduced reporter activity in all reporter  
280 constructs (Fig. 6a). In RAW cells strong reduction (66%) was noted only in MafK25  
281 construct (Fig. 6b). Collectively, these results point to a direct involvement of MafK in  
282 the repressive regulatory activity exhibited in expression-restrictive cells by MafK  
283 binding-regions.

284

285 **Figure 6- MafK mediates the repressive activity of MafK regulatory-regions in**  
286 **expression-restrictive cells.** NIH3T3 (a) or RAW (b) cells were transiently transfected  
287 with pGL3-IRF8p-Luc-MafK reporter constructs and pMSCV-MafK overexpression  
288 vector. Luciferase activity was normalized to Rennilla activity and total protein amount.  
289 Relative Luciferase activity was calculated as ratio between MafK construct activity  
290 and control (Luciferase empty-vector). \*\*p-value<0.01 student's t-test, n=3-4.

291

292 Each of MafK binding-regions harbors several Maf response elements (MAREs) with  
293 different affinity scores (JASPAR database (24)), among them a MafK/Bach1  
294 composite element, a known co-repressor of MafK (27, 28). As our results in Fig. 5  
295 point to the role of MafK as mediator of chromatin conformation, the functionality of  
296 each the MAREs was characterized using the retroviral Luciferase reporter assay in  
297 expression-restrictive NIH3T3 cells. Each region was divided into segments according

298 to the distribution of putative binding-sites, and cloned separately upstream to the IRF8  
299 promoter in the pMSCV-IRF8p-Luc reporter construct. NIH3T3 cells were infected  
300 with individual segmented constructs and relative Luciferase reporter activity was  
301 calculated. MafK25- This binding-region has numerous putative MAREs, of which  
302 three exhibit high affinity score (>10), including a MafK/Bach1 composite element.  
303 The MafK25 region was divided into three segments (A-C, Fig. 7ai): (A) harboring a  
304 MafK/Bach1 element and two lower-score MAREs (B) harboring two high-score  
305 MAREs and one low-score MARE (C) having no MARE (control). As expected, the  
306 MafK25 segmentation-analysis (Fig. 7aai) demonstrated decreased Luciferase activity  
307 only in constructs harboring MAREs (MafK25\_A and MafK25\_B). MafK25\_C, having  
308 no MafK DNA binding motif, had no effect on reporter activity, similar to empty-  
309 vector. MafK20 has only two putative MAREs; a low score motif (5) and a  
310 MafK/Bach1 composite element, having the highest score (17) of all MAREs in all of  
311 MafK regions.

312 MafK20- This binding-region was divided into four segments: (A) having no MARE  
313 (control) (B) harboring the low-score MARE (C) harboring the MafK/Bach1 element  
314 (D) harboring both MAREs (Fig. 7bi). As evident in Fig. 7bii, control segment  
315 (MafK20\_A) exhibited no significant change in reporter activity relative to empty-  
316 vector. MafK20\_B also showed no decrease in Luciferase activity, but rather a slight  
317 increase. However, since this segment harbors a low-score MARE, this segment was  
318 expected to not convey significant repressive activity. Surprisingly, segment C,  
319 harboring a high-score MafK/Bach1 element, also did not exhibit repressive activity,  
320 but rather significant 2-fold increase of reporter activity. However, segment D,  
321 harboring both MAREs, elicited more than 90% decrease in reporter activity. Taken  
322 together, only cooperative effect between the two MafK binding-sites lead to reporter  
323 repression.

324 MafK-int6- This binding-region harbors three high-score MAREs (11-12.5) in close  
325 proximity to each other (~50 bps), one of which is a MafK/Bach1 composite element.  
326 The MafK-int6 region was divided into four segments (Fig. 7ci): (A) having no MARE  
327 (control) (B) harboring two MAREs, one of which is a MafK/Bach1 element (C)  
328 harboring all of MAREs (D) harboring the highest score MARE. In MafK-int6 binding-  
329 sites segmentation analysis (Fig. 7cii), control segment (MafK-int6\_A) exhibited slight  
330 but significant decrease in reporter activity relative to empty-vector. Although MafK-  
331 int6\_B harbors two high-score MAREs, it did not exhibit decreased Luciferase activity,

332 but rather a slight increase. Segment C, harboring an additional MARE with the highest  
333 score in this region (12.5), exhibited a significant decrease in reporter activity. Finally,  
334 segment D, harboring only this high score MARE, exhibited similar decrease (90%) in  
335 Luciferase activity. The data suggest that the main repression activity exerted by MafK-  
336 int6 region is elicited by the MARE element located in segment D, which counteracts  
337 the activity of the other segments.

338

339 **Fig 7. Differential MARE activity in MafK regulatory-regions.** MafK25, MafK20  
340 and MafK-int6 regulatory-regions (ai,bi,ci respectively) were divided into segments  
341 and MARE sites are illustrated in triangular (MafK) and rectangular (MafK/Bach1)  
342 with their predictive affinity score, as determined by the Jasper motif discovery (24).  
343 NIH3T3 were infected with pMSCV-IRF8p-Luc construct harboring either MafK25,  
344 MafK20 or MafK-int6 segmented regulatory-regions (aii,bii,cii respectively).  
345 Retroviral Luciferase activity was normalized to vector genomic copy number, as  
346 determined using real-time qPCR. Relative Luciferase activity was calculated as ratio  
347 between MafK construct activity and empty-vector (control). \*p-value<0.05, \*\*p-  
348 value<0.01 student's t-test, n=2-3.

349

350 Collectively, the deletions analysis within the three MafK binding-regions (Fig. 7)  
351 further emphasize the fact that MafK is directly involved in suppressive regulation of  
352 MafK binding-regions, as control segments, harboring no MafK motif, show similar  
353 reporter activity as control empty-vector.

354 **MafK-int6 regulatory region mediates repression via chromatin remodeling in**  
355 **IRF8 locus in BAC reporter system**

356 Previously, we demonstrated that IRF8 harbors a regulatory region in its 3<sup>rd</sup> intron,  
357 mediating restrictive-expression via chromatin remodeling in non-hematopoietic cells.  
358 Deletion of IRF8 3<sup>rd</sup> intron in the BAC-IRF8.1 construct resulted in alleviation of GFP  
359 reporter-gene expression in restrictive NIH3T3-IRF8.1- $\nabla$ int3 cells (14). Based on the  
360 above results, we propose that MafK-int6 binding-region also acts as an intronic  
361 regulatory element modulating chromatin conformation. To this end, the BAC-IRF8.1-  
362 GFP reporter system was employed. As mentioned above, the BAC harbors all of IRF8  
363 regulatory regions and regains original chromatin architecture regardless of integration  
364 point (29, 30). A new BAC-IRF8.1- $\nabla$ MafK-int6 was generated by replacing the MafK-

365 int6 binding-region with a Zeocin resistance cassette in bacteria, as previously  
366 described (14). Subsequently, IRF8-restrictive NIH3T3-IRF8.1- $\nabla$ MafK-int6 reporter  
367 cell clones were generated by transfecting this BAC construct as described under  
368 Methods. MafK-int6 binding-region repressive activity in expression-restrictive  
369 NIH3T3 cells was analyzed by FACS. Since IRF8 is IFN $\gamma$  inducible gene only in  
370 expression-permissive cells (14), the level of the reporter gene was also tested in the  
371 presence of IFN $\gamma$ . The data clearly showed that deletion of MafK-int6 binding-region  
372 resulted in alleviation of GFP reporter expression relative to the control (complete  
373 BAC-IRF8.1) with or without IFN $\gamma$  induction (Fig. 8a). Specifically, 1.4-fold GFP  
374 alleviation was observed even without IFN $\gamma$  induction, which was further enhanced by  
375 IFN $\gamma$  treatment, resulting in 3-fold induction of GFP expression in comparison to  
376 control (Fig. 8b, black and grey bars respectively). As expected, analysis of  
377 endogenous IRF8 mRNA expression level in these cells showed no such alleviation  
378 since the endogenous 6<sup>th</sup> intron is intact (Fig. 8c). These results highlight the role of this  
379 intron in IRF8 regulation in expression-restrictive cells.

380 The data presented in Fig. 4 showed that MafK KD in NIH3T3-IRF8.1 cells resulted in  
381 decreased repressive H3K27me3 histone PTM enrichment over the GFP reporter-gene  
382 as well as the endogenous IRF8 gene. Accordingly, we expected that deletion of MafK-  
383 int6 repressor element will result in a change in the chromatin landscape, *i.e.* open  
384 chromatin conformation. Therefore, H3K27ac (a common marker for open chromatin  
385 (31)) ChIP-qPCR was performed across the GFP reporter-gene in cells harboring the  
386 BAC constructs, BAC-IRF8.1- $\nabla$ MafK-int6 and control BAC-IRF8.1 (Fig. 8d).  
387 Endogenous HPRT promoter (expressed house-keeping gene) and endogenous Nramp1  
388 promoter (repressed hematopoietic gene) regions were used as positive and negative  
389 controls, respectively. In NIH3T3-IRF8.1- $\nabla$ MafK-int6 cells the H3K27ac PTM  
390 enrichment was 4-fold higher over the GFP reporter region compared to control  
391 NIH3T3-IRF8.1 cells. Moreover, a 20-fold enrichment was observed compared to the  
392 negative (repressed) control promoter. Even compared to the positive control, H3K27ac  
393 enrichment over GFP reporter-gene was significantly higher (2-fold). As expected, each  
394 control gene exhibited similar PTM enrichment for both BAC harboring cell-types.  
395 Additionally, the positive control, HPRT exhibited approximately 10-fold H3K27ac  
396 enrichment relative to the repressed Nramp1 promoter. Collectively, analysis of active  
397 (H3K27ac) histone PTM points to a more accessible chromatin-state over the GFP

398 reporter-gene on the BAC construct following removal of MafK-int6 regulatory-region  
399 in IRF8 expression-restrictive NIH3T3 cells. Since we demonstrated that the BAC-  
400 IRF8 reporter constructs authentically report on IRF8 endogenous gene expression (Fig.  
401 2d and (14)), it strongly suggests that multiple intronic elements, the 6<sup>th</sup> and the 3<sup>rd</sup>  
402 introns, orchestrate IRF8 chromatin architecture in expression-restrictive cells.

403

404 **Fig 8. MafK-int6 regulatory-region mediates repressive histone PTM signature in**  
405 **restrictive NIH3T3-IRF8.1 reporter cells.** NIH3T3 clones harboring BAC-IRF8.1  
406 (control) or BAC-IRF8.1- $\nabla$ MafK-int6 were either treated or not-treated with IFN $\gamma$  for  
407 16 hrs. Cells were then taken for FACS analysis of GFP reporter expression level. (a)  
408 Representative histogram of NIH3T3-IRF8.1 (untreated, grey-filled histogram, and  
409 IFN $\gamma$ -treated, dotted-grey histogram) and NIH3T3- $\nabla$ MafK-int6 (untreated, black  
410 histogram, and IFN $\gamma$ -treated, dotted-black histogram) cells. (b) Graph shows relative  
411 mean fluorescence intensity (MFI) of treated and untreated NIH3T3-IRF8.1 and  
412 NIH3T3- $\nabla$ MafK-int6 cells. Untreated NIH3T3-IRF8.1 were determined as 1. Results  
413 are mean $\pm$ AvDev of two NIH3T3- $\nabla$ MafK-int6 clones, n=3. (c) Endogenous IRF8  
414 mRNA expression level was measured using real-time qRT-PCR. Results are  
415 mean $\pm$ AvDev of two NIH3T3- $\nabla$ MafK-int6 clones, n=3. (d) NIH3T3 cells harboring  
416 either BAC-IRF8.1 or BAC-IRF8.1- $\nabla$ MafK-int6 were subjected to H3K27ac ChIP-  
417 qPCR. Nramp1 promoter serves as negative control and HPRT promoter serves as  
418 positive control. Enrichment over the GFP gene was detected using primers targeting  
419 GFP coding region. Value are mean $\pm$ AvDev of %input. \*p-value<0.05, student's t-test,  
420 n=2-3.

421

## 422 Discussion

423 Lineage-specific gene expression is a two-facet process; while one facet is involved in  
424 regulating cell-type specific expression, the other executes an opposing program aimed  
425 at long-term gene silencing in expression-restrictive cells. Chromatin architecture is the  
426 determining factor in this cell-fate decision process. While it is clear that condensed  
427 chromatin is essential for sustained repression, the molecular cues recruiting the  
428 chromatin remodeling machinery are not well characterized. Specifically, the roles of  
429 the TF IRF8 in hematopoiesis are well documented (7, 32-34). Yet, the molecular

430 mechanisms preventing misexpression in restrictive cells are not characterized.  
431 Recently, we reported that IRF8 3<sup>rd</sup> intron is sufficient and necessary to initiate gene  
432 silencing in non-hematopoietic cells, highlighting its role as a nucleation core for  
433 repressed chromatin during differentiation (14). The current study was aimed at  
434 identifying DNA binding factors that may serve as the mediators or cues that recruit the  
435 chromatin remodeling machinery. To this end, a high-throughput lentiviral shRNA  
436 library was screened in a reporter cell-line, which led to the identification of MafK as  
437 an IRF8 repressor in expression-restrictive cells (14). MafK acts as repressor by  
438 forming homo- or hetero- dimers with other TFs, mainly with Bach1 (17, 28, 35).  
439 Further, MafK has been shown to interact with histone modifying complexes, such as  
440 the PcG complexes, through its partner MAT2 $\alpha$ , mediating repressive histone  
441 modifications (21, 25). MafK was established as a bona-fide IRF8 repressor, as MafK  
442 KD in expression-restrictive GFP-IRF8 reporter cells resulted in significant GFP  
443 reporter alleviation (Fig. 2b and c). Moreover, MafK directly affected endogenous IRF8  
444 expression, as IRF8 protein expression was also alleviated following MafK KD (Fig.  
445 2b and c). This co-elevated expression of GFP and IRF8 following MafK silencing  
446 underscores the authenticity of the BAC-IRF8-GFP reporting system. MafK ChIP-Seq  
447 in IRF8-restrictive (NIH3T3) and permissive (RAW) cells revealed three MafK  
448 binding-sites in IRF8 locus: -25 kb, -20 kb and MafK-int6, respectively (Fig. 3b and c).  
449 These relatively "low-resolution" binding-regions (~200bp) are abundant with putative  
450 MafK response elements (MAREs) (Fig. 7ai, bi and ci). The ubiquitous MafK  
451 expression (S4 Fig.) and binding profile between expression-restrictive and permissive  
452 cells is not surprising due to MafK dual activity, depending on its interacting partner  
453 (18). Yet, a higher degree of MafK occupancy in permissive cells compared with  
454 restrictive cells was noted for binding-region -25kb (p-value=  $7 \cdot 10^{-11}$ ) and to a lesser  
455 extent for -20kb (p-value= $9 \cdot 10^{-5}$ ) but not for IRF8-int6 (p-value= $10^{-1}$ ) (Fig. 3b).  
456 Individual MafK binding-regions exhibited cell-type specific effect using lentiviral  
457 reporter system, *i.e.* significant reduction in Luciferase reporter-gene activity in IRF8  
458 expression-restrictive cells as opposed to enhanced activity in IRF8 expression-  
459 permissive cells (Fig. 5c). Moreover, these elements were sufficient to exert chromatin  
460 remodeling in a random genomic context. This lineage-specific regulatory effect was  
461 observed only when the reporter vectors were integrated into the genome and assembled  
462 chromatin conformation. This did not take place in transient transfection assays, where

463 the transfected plasmid DNA does not assemble proper chromatin structure (Fig. 3c and  
464 d, black columns) (26). Further, MafK-int6 region acts as an intragenic *cis*-repressor as  
465 deletion of this region from the BAC-IRF8 construct in expression-restrictive cells was  
466 sufficient to alleviate the expression of the GFP reporter-gene. As expected, no effect  
467 was observed on the expression of the endogenous IRF8 in the same cells (Fig. 8c).  
468 Moreover, the deletion of MafK-int6 region was accompanied by transition towards  
469 accessible chromatin conformation, evident by significant increase in H3K27ac histone  
470 mark in this region (Fig. 8d). Finally, MafK KD coincided with reduced repressive  
471 H3K27me3 histone PTM deposition (Fig. 4). Together, our results underscore the role  
472 of MafK in silencing IRF8 expression by affecting local chromatin architecture.  
473 Similar silencing elements have been previously described by Jermann et al. (36),  
474 demonstrating that small CpG-islands can autonomously recruit PcG components and  
475 establish an H3K27me3 domain, suggesting that local sequence autonomy may be a  
476 general feature of PcG recruitment in the mouse genome. We propose that in non-  
477 hematopoietic cells MafK binding-regions serve as recruiting elements for the  
478 repressive PcG complex, leading to heterochromatin formation and subsequent IRF8  
479 silencing. This is supported by previous reports of MafK interactions with repressive  
480 chromatin modifying complexes, such as the NuRD and PcG complexes, regulating  
481 downstream gene *in-cis* (21, 37). Interestingly, while in restrictive cells all regions  
482 exhibited repressive reporter activity, in permissive cells only MafK25 and MafK20  
483 enhanced reporter-gene expression. Concomitantly, these regions also exhibited  
484 significantly higher degree of MafK occupancy in permissive cells compared with  
485 restrictive cells (Fig. 3b). This may be due to the fact that the MARE motif is shared  
486 with the AP-1 TF family proteins, such as Jun and Fos, which are known MafK binding-  
487 partners (20, 35). Jun and Fos are also known IRF8 activators, part of the IFN $\gamma$  signaling  
488 pathway (38), and exert cell-type regulatory activity (39). Alternatively, other members  
489 of the Maf family, c-Maf or MafB, which are highly expressed in IRF8-permissive  
490 cells, may preferentially bind the MARE sites and compete with MafK binding (40,  
491 41), leading to transcriptional activation. The dual-functionality of a single *cis*-  
492 regulatory element suggests a mechanism for efficient toggling between effector states  
493 in changing environments. This dual-regulatory phenomena has been described in  
494 developmental enhancers and lineage-specific genes controlling cell-identity plasticity  
495 (37, 42, 43).



496 MafK exhibited preferential binding for specific MARE sites in each of the regulatory  
497 binding-regions in IRF8-restrictive cells. Only regulatory segments harboring a high-  
498 score MARE site exhibited repressive effect, as was evident by retroviral-mediated  
499 reporter assay, as opposed to low-score MAREs and/or MafK/Bach1 composite  
500 element (Fig. 7). This is expected as silencing elements specificity is finely tuned, often  
501 being affected by flanking sequences and *cis*-elements (44). The fact that elements not  
502 harboring a MARE motif did not elicit repressive reporter-gene activity in IRF8-  
503 restrictive cells (Fig. 7) highlights the direct involvement of MafK in suppressive  
504 regulation of MafK binding-regions.

505 Interestingly, some MAREs exhibited enhanced reporter activity when separately  
506 present in the reporter segment (MafK20\_B, MafK20\_C and MafK-int6\_B, Fig. 7), but  
507 when combined with an additional MARE site demonstrated significant silencing effect  
508 (MafK20\_D, MafK-int6\_C and MafK-int6\_D, Fig. 7). Cooperative binding of a TF to  
509 multiple DNA binding-sites can intensify or modify its repressor function (44). Such  
510 cooperative effect was also suggested for the mouse HoxD PcG response element  
511 (PRE), while the full-length PRE exhibited substantial silencing effect, two of its  
512 fragments enhanced gene expression and one fragment demonstrated a silencing effect  
513 (45).

514 Lastly, as Bach1 is the most studied MafK co-repressor, we examined its possible role  
515 in MafK mediated silencing of IRF8. Although all of MafK binding-regions harbor a  
516 MafK/Bach1 composite DNA binding motif, segmented element harboring this motif  
517 did not exert repressive reporter gene activity (Fig. 7). Bach1 overexpression combined  
518 with transient MafK Luciferase reporter assay also did not significantly reduce reporter  
519 gene activity (S5 Fig.). Moreover, Bach1 ChIP-qPCR did not exhibit binding in either  
520 of MafK regulatory regions (S6 Fig.). Thus MafK's repressive partner in IRF8-  
521 restrictive cells is yet an unidentified repressor, or that MafK silencing activity is a  
522 result of MafK homodimerization (17).

523 Taken together, we propose that MafK binding-regions serve as dual-functioning  
524 regulatory elements. In IRF8-restrictive cells, these sites are occupied by MafK homo-  
525 or hetero- dimers, which contributes to the repressive regulatory equilibrium.  
526 Conversely, in IRF8-premislive cells, these regions may preferentially be occupied by  
527 other Maf (46, 47) or AP-1 family members (38), thereby competing with the repressive

528 MafK complex, shifting the equilibrium to an active transcriptional state. Additionally,  
529 we suggest that the molecular mechanisms preventing misexpression of lineage-  
530 specific genes is composed of several checkpoints. Thus far, we have identified two  
531 such control checkpoint elements: the IRF8 3<sup>rd</sup> intron (14), acting also as a  
532 transcriptional activator in expression-permissive cells (Khateb et al, unpublished data),  
533 and the multiple MafK regulatory binding-sites that also function in a dual manner.  
534

## 535 **Methods**

### 536 **Cell-lines**

537 NIH3T3 (Mouse embryo fibroblast), RAW (RAW267.4, Murine  
538 monocytes/macrophages-like) and 293FT (Human embryonal kidney) were obtained  
539 from ATCC, Manassas, Virginia, USA (CRL-1658, TIB-71 and CRL-3216,  
540 respectively). These cell-lines were maintained in DMEM supplemented with 10%  
541 FCS, 2.5 µg/ml Amphotericin and 50 µg/ml Gentamycin Sulfate (Biological Industries,  
542 Beit-Haemek, Israel).

### 543 **Pooled shRNA library**

544 The mouse DECIPHER (15) pooled shRNA library screen was performed according to  
545 the DECIPHER user manual. To produce library viral pool, 120 µg of library DNA in  
546 combination with lentiviral packaging plasmids were transfected to 293FT cells in ten  
547 15 cm tissue culture plates using Lipofectamine2000 and PLUS transfection reagents  
548 (Invitrogen, Carlsbad, CA, USA). The viral titer was estimated using the TagRFP  
549 reporter-gene on the shRNA library vector. The MOI was determined from the  
550 calibration curve provided by the library's user manual.

551 For the library screen,  $2 \cdot 10^6$  NIH3T3-IRF8.1 cells were seeded on the day of infection  
552 in a 15 cm tissue culture plate, in three replicates. Cells were transduced at an MOI of  
553 0.7 to ensure infection of no more than a single shRNA construct in each cell. 72 hrs  
554 post-infection, Puromycin selection was added. 48 hrs post-selection, the cells were  
555 collected, counted and  $\sim 3 \cdot 10^7$  cells (>1000-fold library complexity) were taken for  
556 FACS sorting. The top 5% GFP<sup>+</sup> cells were sorted as positive population and the 50%  
557 GFP<sup>-</sup> cells were sorted as negative (control) population. Following the sorting process,  
558 genomic DNA was extracted from each population by Phenol:Chloroform extraction

559 followed by Ethanol precipitation. The DNA was diluted at estimated 2  $\mu\text{g}/\mu\text{l}$   
560 concentration, assuming yield of 10  $\mu\text{g}$  DNA per  $10^6$  cells.

561 NGS library preparation was performed according to library's user manual. shRNA  
562 library barcodes were amplified from genomic DNA using PCR and FwdHTS\_R1 and  
563 RevHTS\_R1 library primers. A second PCR reaction was performed from 5% of  
564 volume from the first PCR with nested library PCR primers (FwdGex\_R2 and  
565 RevGex\_R2) and 26-28 cycles. These primers include Illumina's HiSeq adapter  
566 sequences. The nested PCR products were purified on a 2% agarose gel by gel-  
567 electrophoresis using the glass beads extraction method (48) and resuspended in 5  $\mu\text{l}$   
568  $\text{H}_2\text{O}$ . Next, the library was taken for NGS on the Illumina HiSeq2500 (Illumina, San  
569 Diego, CA, USA) using DECIPHER\_GexSeqN sequence primer.

570 The shRNA sequencing results were initially analyzed using the DECIPHER  
571 specialized Barcode Analyzer and Deconvoluter software (Cellesta, Mountain View,  
572 CA, USA). The software yields a list of shRNA constructs and their sequencing read  
573 counts. First, the read counts were normalized to 20 million total sequencing reads.  
574 Next, for each shRNA construct the fold-enrichment between the norm.count in the  
575  $\text{GFP}^{\text{high}}$  population compared to the control ( $\text{GFP}^{\text{low}}$  population) was calculated. A fold-  
576 enrichment threshold of 1.9 was set, and a gene was considered enriched if it had at  
577 least two shRNA constructs to pass the threshold. The fold enrichment of the gene was  
578 considered to be the maximal fold-enrichment of its shRNA constructs. Finally, a  
579 candidate list was comprised of genes that were found to be over 1.9-fold enriched in  
580 all three replicates. The genes were annotated using DAVID bioinformatics resources  
581 (49) for cellular localization and function.

## 582 **MafK constructs**

583 For shRNA lentiviral vector generation, the best performing shRNA construct targeting  
584 MafK (shMafK) from the shRNA library (15) was used and shRNA double-strand  
585 oligos cloned into lentiviral pLKO.1-TRC-Puro cloning vector (Addgene plasmid  
586 #10878), according to The RNAi Consortium protocol..

587 shMafK\_F ccggcacatggccaactaggatgaagttaatattcatagcttcctcctggtggccatgtgtttttg

588 shMafK\_R aattcaaaaacacatggccaaccaggatgaagctatgaatattaacttcctcctagttggccatgtg

589 For MafK overexpression, MafK cDNA was PCR amplified and digested with  
590 BglII/EcoRI and cloned into pMSCV-Puro empty backbone (Clontech, Mountain

591 View, CA, USA). For primers sequences used for cloning see **Error! Reference source**  
592 **not found.**

### 593 **BAC IRF8 reporter constructs**

594 The NIH3T3-BAC-IRF8.1 reporter cell-line was generated as previously described  
595 (14). To create BAC-IRF8.1- $\nabla$ MafK-int6, the MafK-int6 binding-region on the BAC-  
596 IRF8.1 construct was replaced with a Zeocin antibiotic resistance gene under the  
597 regulation of the EM7 bacterial promoter, as previously described (14). The  $\nabla$ MafK-  
598 int6 donor fragment was PCR amplified using primers containing 50 bps homology-  
599 arms adjacent to MafK-int6 binding-region, 5'arm\_int6-em7 and 3'arm-Mafk\_int6-  
600 zeo\_R (see S1 Table). PCR reaction was done in LifePro Thermal cycler (Bioer,  
601 Hangzhou,China.) according to the following conditions: 94°C for 2 min, 40 cycles of  
602 94°C for 30 sec, 50°C for 1 min and 64°C for 2 min, and finally 72°C for 7 min. PCR  
603 fragment was separated on 1% agarose gel-electrophoresis and purified using  
604 NucleoSpin Gel and PCR Clean-up (Macherey-Nagel).

### 605 **Generating BAC-IRF8.1- $\nabla$ MafK-int6 stable clones**

606  $7 \cdot 10^5$  NIH3T3 cells were seeded in each well of 6-wells tissue culture plates with 2 ml  
607 DMEM fresh media containing 5% FCS and incubated at 37°C in 5% CO<sub>2</sub> incubator.  
608 16-24 hrs later, the cells were transfected with 5  $\mu$ g of BAC DNA using Metafectene-  
609 Pro (Biontext laboratories GmbH, Germany), according to manufacturer's instructions.  
610 Cells were harvested 24 hrs later and plated on 10 cm culture dishes and after additional  
611 16 hrs, Geneticin (G418) was added to select for stably transfected clones. Individual  
612 clones were isolated 14-18 days later, and the copy number of various transfected BAC-  
613 IRF8 reporter clones was determined by qPCR of isolated genomic DNA in comparison  
614 to endogenous single copy genes such as HPRT and Nramp1.

### 615 **Chromatin immunoprecipitation (ChIP)**

616 Either  $2 \cdot 10^6$  or  $10^7$  NIH3T3 cells (for histone PTM or MafK/Bach1 ChIP, respectively)  
617 were fixed in 1% Formaldehyde fixing buffer (50 mM HEPES pH 7.9, 100 mM NaCl,  
618 1 mM EDTA, 0.5 mM EGTA, 1% Formaldehyde) and quenched with 125mM glycine.  
619 Chromatin was sheared using Covaris M220 Focus ultrasonicator (Covaris, Inc.,  
620 Woburn, MA, USA) and so fixed cells were lysed according to Covaris manufacturer's  
621 protocol. For the immunoprecipitation step, Protein-G-Dynabeads (Invitrogen,  
622 Carlsbad, CA, USA) were incubated with monoclonal antibodies, recognizing either  
623 specific histone PTMs, MafK or Bach1 for at least 8 hrs in 4°C. The following

624 antibodies were used:  $\alpha$ H3K27ac (Abcam, CAT#ab4729),  $\alpha$ H3K27me3 (Upstate,  
625 CAT#17-622),  $\alpha$ MafK (Santa Cruz, CAT#sc-22831 and anti-normal rabbit IgG  
626 (Upstate, CAT#17-622),  $\alpha$ Bach1 (C-20) (Santa Cruz, CAT#sc14700x). Sheared  
627 chromatin and coated-Dynabeads were incubated at 4°C over-night. Following  
628 chromatin-Dynabeads incubation, Dynabeads underwent several washes: twice with  
629 low-salt RIPA (10 mM Tris-HCl, pH 8.0, 1 mM EDTA, 150 mM NaCl, 1% Triton X-  
630 100, 0.1% SDS, 0.1% NaDOC), twice with high-salt RIPA buffer (10 mM Tris-HCl,  
631 pH 8.0, 1 mM EDTA, 500 mM NaCl, 1% Triton X-100, 0.1% SDS, 0.1% NaDOC), ,  
632 twice with LiCl RIPA buffer (10 mM Tris-HCl, pH 8.0, 1 mM EDTA, 250 mM LiCl,  
633 0.5% NP-40, 0.1% NaDOC) and once with TE. The Dynabeads underwent two elution  
634 steps, each with 100  $\mu$ l ChIP elution buffer (10 mM Tris-HCl, pH 8.0, 5 mM EDTA,  
635 300 mM NaCl, 1% SDS) and incubation at 65°C for 20 min. Eluates underwent reverse-  
636 crosslinking by incubation at 65°C over-night. Following reverse-crosslinking, samples  
637 were treated with RNase and Proteinase K (Sigma-Aldrich) .ChIP DNA was purified  
638 using standard Phenol:Chloroform separation and Ethanol precipitation.

639 For histone PTM, ChIP samples were analyzed using real-time qPCR, as described  
640 hereafter (for primers sequences used see **Error! Reference source not found.**). For  
641 ChIP-Seq, samples were taken for NGS on the Illumina HiSeq 2500 (Illumina, San  
642 Diego, CA, USA). Library quality-control was performed using FASTQ software  
643 (version 0.11.5). For quality and adapter trimming trim\_galore (cutadapt version 1.9)  
644 was used and sequencing reads were mapped using BWA aln v0.7.12. Peak calling was  
645 carried out by MACS2 v2.1.1 (20160309) and DiffBind v2.0.5 (R package) was used  
646 for peak merging and differential binding analysis (NIH3T3 binding compared to RAW  
647 binding). Finally, annotation were performed using ChIPseeker v1.8.3 (R package). For  
648 ChIP-PCR, ChIP samples were amplified using ReddyMix PCR Master Mix (Thermo  
649 Scientific, Waltham, MA, USA) with primers targeting MafK binding-region and  
650 resolved on 2% agarose gel.

### 651 **Real-time qPCR**

652 The primers used for real-time qPCR were designed using PrimerExpress™ software  
653 (Applied Biosystems, Foster City, CA, USA), see **Error! Reference source not**  
654 **found.** One  $\mu$ g of total RNA was reverse transcribed to cDNA using qScript™ cDNA  
655 Synthesis Kit (Quanta, Guishan District, Taiwan) according to manufacturer's  
656 instructions. Reactions were performed using LifePro Thermal cycler (Bioer,

657 Hangzhou, China). cDNA or genomic DNA was amplified using Power PerfeCTa  
658 SYBR® Green SuperMix, Low ROX (Quanta, Guishan District, Taiwan) on the  
659 QuantStudio 12K Flex (Applied Biosystems by Life technology) according to the  
660 manufacturer's instructions. Amplification conditions were as follows: 95°C for 20 sec  
661 followed by 40 cycles of 95°C for 1 sec and 60°C for 20 sec and then melt curve  
662 program of 95°C for 15 sec, 60°C for 1 min and 95°C for 15 sec. Relative gene  
663 expression level was determined using the dCt calculation method (gapdh gene was  
664 used as normalizer for cDNA amount and IRF8 2<sup>nd</sup> intron was used as normalizer for  
665 genomic DNA).

#### 666 **Luciferase reporter assay**

667 Plasmid reporter constructs were generated by PCR amplifying MafK binding-regions  
668 (MafK25, MafK20 and MafK-int6) with primers flanked by MluI sites (see **Error!**  
669 **Reference source not found.**) and sub-cloned to pGL3 Luciferase vector (pGL3-Luc,  
670 Promega, Madison, WI, USA) driven by the IRF8 promoter (-1500 bps to the TSS).  
671 The MluI site is located upstream to the IRF8 promoter generating pGL3-Luc-MafK25,  
672 pGL3-Luc-MafK20 and pGL3-Luc-MafK-int6 reporter constructs. These plasmids  
673 were transfected to NIH3T3 or RAW cells and reporter-gene assays were performed 48  
674 hrs later using the Dual-Luciferase Reporter Assay System (Promega, Madison, WI,  
675 USA), as previously described (14).

676 Retroviral reporter constructs were generated by PCR amplifying the pGL3 reporter  
677 cassettes described above and sub-cloning into the pMSCV retroviral vector, generating  
678 pMSCV-Luc, pMSCV-Luc-MafK25, pMSCV-Luc-MafK20 and pMSCV-Luc-MafK-  
679 int6, respectively (as illustrated in Fig. 5a). NIH3T3 or RAW cells were infected and  
680 reporter-gene assays were performed 72 hrs later (to ensure chromosomal integration)  
681 as previously described (14) using the Dual-Luciferase Reporter Assay System  
682 (Promega, Madison, WI, USA). For each sample, Luciferase light unit reads were  
683 normalized to genomic retroviral copy number, as determined using real-time QPCR  
684 with primers for Luciferase and IRF8 2<sup>nd</sup> intron as reference (see **Error! Reference**  
685 **source not found.**).

#### 686 **Flow cytometry**

687 Flow cytometry analysis was performed using BD LSR-II flow cytometer (BD  
688 Bioscience, San Jose, CA, USA) and data was analyzed using Flowing Software 2 (Cell  
689 Imaging Core, Turku Centre for Biotechnology). For IRF8 staining, cells were fixed in

690 4% paraformaldehyde, permeabilized with 0.5% saponin, blocked with 10% normal  
691 donkey serum (Sigma-Aldrich) and stained with either goat anti-IRF8 (Santa Cruz,  
692 CAT# sc-6058) and CFL405 anti-goat IgG (Santa Cruz, CAT# sc-362245) or with  
693 CFL405 anti-goat IgG alone as control. Unstained wild-type NIH3T3 cells were used  
694 as negative control for GFP.

### 695 **Statistical methods**

696 All Experiments were performed in  $n \geq 2$  replicates and values are presented as  
697 means  $\pm$  AvDev. Data were compared by unpaired two-tailed Student's t-test; p-values  
698  $< 0.05$  or  $< 0.01$  were considered to be statistically significant, as indicated in the  
699 appropriate figure. When applicable False Discovery Rate (FDR) correction for  
700 multiple hypotheses testing was employed, using the Benjamini-Hochberg method  
701 (50). Asterisk indicates p-values that are significant after correction with  $\alpha = 0.05$  or  
702  $\alpha = 0.01$ .

### 703 **Data Availability**

704 The MafK ChIP-seq datasets generated during the current study have been deposited in  
705 NCBI's Gene Expression Omnibus (51) and is accessible through GEO Series accession  
706 number GSE113145  
707 (<https://www.ncbi.nlm.nih.gov/geo/query/acc.cgi?acc=GSE113145>), respectively. The  
708 shRNA library screen datasets are available in S2 Table.

### 709 **Competing interests statement**

710 Cellecta, Inc. was a provider of lentiviral shRNA libraries for this study and is the  
711 employer of Dr. Donato Tedesco. The authors declare no competing financial interests.

### 712 **Acknowledgements**

713 We are grateful to Drs. Khateb, Koren and Barnea-Yizhar for critical reading of the  
714 manuscript, to the Technion's Genome Center and the Russell Berrie Nanotechnology  
715 Institute for the support. This research was funded by The Israel Science Foundation  
716 [grant number 224/15 to B.Z.L]. B.Z.L. is an incumbent of the Lily and Silvian Marcus  
717 Chair in Life Sciences, Technion.

718

719 **Contributions**

720 N.F. and B.Z.L. proposed and designed the experiments. N.F., M.Z., and A.A.,  
721 performed the experiments. T.D. analyzed the barcoded shRNA library data.  
722 N.F. and B.Z.L. wrote the manuscript. B.Z.L. supervised the project.

723 **Corresponding authors**

724 Correspondence to B.Z. Levi

725

726

727

728

729



## 730 **References**

731

- 732 1. Sparmann A, van Lohuizen M. Polycomb silencers control cell fate,  
733 development and cancer. *Nature reviews Cancer*. 2006;6(11):846-56.
- 734 2. Spilianakis CG LM, Town T, Lee GR, Flavell RA. Interchromosomal  
735 associations between alternatively expressed loci. *Nature*. 2005;435:637-45.
- 736 3. Brettingham-Moore KH, Taberlay PC, Holloway AF. Interplay between  
737 Transcription Factors and the Epigenome: Insight from the Role of RUNX1 in  
738 Leukemia. *Front Immunol*. 2015;6:499.
- 739 4. Chen T, Dent SY. Chromatin modifiers and remodellers: regulators of cellular  
740 differentiation. *Nature reviews Genetics*. 2014;15(2):93-106.
- 741 5. Laiosa CV, Stadtfeld M, Graf T. Determinants of lymphoid-myeloid lineage  
742 diversification. *Annu Rev Immunol*. 2006;24:705-38.
- 743 6. Netherby CS, Abrams SI. Mechanisms overseeing myeloid-derived suppressor  
744 cell production in neoplastic disease. *Cancer Immunol Immunother*. 2017;66(8):989-  
745 96.
- 746 7. Wang H, Lee CH, Qi C, Taylor P, Feng J, Abbasi S, et al. IRF8 regulates B-cell  
747 lineage specification, commitment, and differentiation. *Blood*. 2008;112(10):4028-38.
- 748 8. Lee W, Kim HS, Baek SY, Lee GR. Transcription factor IRF8 controls Th1-  
749 like regulatory T-cell function. *Cell Mol Immunol*. 2016;13(6):785-94.
- 750 9. Miyagawa F, Zhang H, Terunuma A, Ozato K, Tagaya Y, Katz SI. Interferon  
751 regulatory factor 8 integrates T-cell receptor and cytokine-signaling pathways and  
752 drives effector differentiation of CD8 T cells. *Proc Natl Acad Sci U S A*.  
753 2012;109(30):12123-8.
- 754 10. Kanno Y, Kozak C, Schindler C, Driggers P, Ennist D, Gleason S, et al. The  
755 genomic structure of the murine ICSBP gene reveals the presence of the gamma  
756 interferon-responsive element, to which an ISGF3 alpha subunit (or similar) molecule  
757 binds. *Molecular and Cellular Biology*. 1993;13(7):3951-63.
- 758 11. Holtschke T, Lohler J, Kanno Y, Fehr T, Giese N, Rosenbauer F, et al.  
759 Immunodeficiency and chronic myelogenous leukemia-like syndrome in mice with a  
760 targeted mutation of the ICSBP gene. *Cell*. 1996;87(2):307-17.

- 761 12. Schmidt M, Nagel S, Proba J, Thiede C, Ritter M, Waring JF, et al. Lack of  
762 interferon consensus sequence binding protein (ICSBP) transcripts in human myeloid  
763 leukemias. *Blood*. 1998;91(1):22-9.
- 764 13. Schmidt M, Hochhaus A, Nitsche A, Hehlmann R, Neubauer A. Expression of  
765 nuclear transcription factor interferon consensus sequence binding protein in chronic  
766 myeloid leukemia correlates with pretreatment risk features and cytogenetic response  
767 to interferon-alpha. *Blood*. 2001;97(11):3648-50.
- 768 14. Khateb M, Fourier N, Barnea-Yizhar O, Ram S, Kovalev E, Azriel A, et al. The  
769 Third Intron of the Interferon Regulatory Factor-8 Is an Initiator of Repressed  
770 Chromatin Restricting Its Expression in Non-Immune Cells. *PLoS One*.  
771 2016;11(6):e0156812.
- 772 15. Collecta I. The DECIPHER open source RNAi Screening Project: Collecta, Inc.;  
773 2013 [Available from: <http://www.decipherproject.net/shRNA-libraries/>].
- 774 16. Blank V. Small Maf proteins in mammalian gene control: mere dimerization  
775 partners or dynamic transcriptional regulators? *J Mol Biol*. 2008;376(4):913-25.
- 776 17. Igarashi K, Itoh K, Motohashi H, Hayashi N, Matuzaki Y, Nakauchi H, et al.  
777 Activity and expression of murine small Maf family protein MafK. *J Biol Chem*.  
778 1995;270(13):7615-24.
- 779 18. Motohashi H, Shavit JA, Igarashi K, Yamamoto M, Engel JD. The world  
780 according to Maf. *Nucleic Acids Res*. 1997;25(15):2953-59.
- 781 19. Yoshida C, Tokumasu F, Hohmura KI, Bungert J, Hayashi N, Nagasawa T, et  
782 al. Long range interaction of cis-DNA elements mediated by architectural transcription  
783 factor Bach1. *Genes to cells : devoted to molecular & cellular mechanisms*.  
784 1999;4(11):643-55.
- 785 20. Katsuoka F, Yamamoto M. Small Maf proteins (MafF, MafG, MafK): History,  
786 structure and function. *Gene*. 2016;586(2):197-205.
- 787 21. Katoh Y, Ikura T, Hoshikawa Y, Tashiro S, Ito T, Ohta M, et al. Methionine  
788 adenosyltransferase II serves as a transcriptional corepressor of Maf oncoprotein. *Mol*  
789 *Cell*. 2011;41(5):554-66.
- 790 22. Consortium EP. A user's guide to the encyclopedia of DNA elements  
791 (ENCODE). *PLoS biology*. 2011;9(4):e1001046.
- 792 23. Genomatix. Genomatix Software Suite [Available from:  
793 <http://www.genomatix.de/solutions/genomatix-software-suite.html>].

- 794 24. Mathelier A, Fornes O, Arenillas DJ, Chen CY, Denay G, Lee J, et al. JASPAR  
795 2016: a major expansion and update of the open-access database of transcription factor  
796 binding profiles. *Nucleic Acids Res.* 2016;44(D1):D110-5.
- 797 25. Igarashi K, Katoh Y. Metabolic aspects of epigenome: coupling of S-  
798 adenosylmethionine synthesis and gene regulation on chromatin by SAMIT module.  
799 *Sub-cellular biochemistry.* 2013;61:105-18.
- 800 26. Jeong S, Stein A. Micrococcal nuclease digestion of nuclei reveals extended  
801 nucleosome ladders having anomalous DNA lengths for chromatin assembled on non-  
802 replicating plasmids in transfected cells. *Nucleic Acids Res.* 1994;22(3):370-5.
- 803 27. Zhou Y, Wu H, Zhao M, Chang C, Lu Q. The Bach Family of Transcription  
804 Factors: A Comprehensive Review. *Clin Rev Allergy Immunol.* 2016;50(3):345-56.
- 805 28. Oyake T, Itoh K, Motohashi H, Hayashi N, Hoshino H, Nishizawa M, et al.  
806 Bach proteins belong to a novel family of BTB-basic leucine zipper transcription  
807 factors that interact with MafK and regulate transcription through the NF-E2 site. *Mol*  
808 *Cell Biol.* 1996;16(11):6083-95.
- 809 29. Sparwasser T, Eberl G. BAC to immunology--bacterial artificial chromosome-  
810 mediated transgenesis for targeting of immune cells. *Immunology.* 2007;121(3):308-  
811 13.
- 812 30. Chandler KJ, Chandler RL, Broeckelmann EM, Hou Y, Southard-Smith EM,  
813 Mortlock DP. Relevance of BAC transgene copy number in mice: transgene copy  
814 number variation across multiple transgenic lines and correlations with transgene  
815 integrity and expression. *MammGenome.* 2007;18(10):693-708.
- 816 31. Creighton MP, Cheng AW, Welstead GG, Kooistra T, Carey BW, Steine EJ, et  
817 al. Histone H3K27ac separates active from poised enhancers and predicts  
818 developmental state. *Proc Natl Acad Sci U S A.* 2010;107(50):21931-6.
- 819 32. Kurotaki D, Tamura T. Transcriptional and Epigenetic Regulation of Innate  
820 Immune Cell Development by the Transcription Factor, Interferon Regulatory Factor-  
821 8. *J Interferon Cytokine Res.* 2016;36(7):433-41.
- 822 33. Tamura T, Kurotaki D, Koizumi S. Regulation of myelopoiesis by the  
823 transcription factor IRF8. *International journal of hematology.* 2015;101(4):342-51.
- 824 34. Schonheit J, Kuhl C, Gebhardt ML, Klett FF, Riemke P, Scheller M, et al. PU.1  
825 level-directed chromatin structure remodeling at the *Irf8* gene drives dendritic cell  
826 commitment. *Cell reports.* 2013;3(5):1617-28.

- 827 35. Kataoka K, Igarashi K, Itoh K, Fujiwara KT, Noda M, Yamamoto M, et al.  
828 Small Maf proteins heterodimerize with Fos and may act as competitive repressors of  
829 the NF-E2 transcription factor. *Mol Cell Biol.* 1995;15(4):2180-90.
- 830 36. Philip Jermann LH, Lukas Burger, and Dirk Schübeler. Short sequences can  
831 efficiently recruit histone H3 lysine 27 trimethylation in the absence of enhancer  
832 activity and DNA methylation. *Proc Natl Acad Sci* 2014;111(33):E3415-E21.
- 833 37. Brand M, Ranish JA, Kummer NT, Hamilton J, Igarashi K, Francastel C, et al.  
834 Dynamic changes in transcription factor complexes during erythroid differentiation  
835 revealed by quantitative proteomics. *Nat Struct Mol Biol.* 2004;11(1):73-80.
- 836 38. Gough DJ, Levy DE, Johnstone RW, Clarke CJ. IFN $\gamma$  signaling-does it  
837 mean JAK-STAT? *Cytokine & growth factor reviews.* 2008;19(5-6):383-94.
- 838 39. Chinenov Y, Kerppola TK. Close encounters of many kinds: Fos-Jun  
839 interactions that mediate transcription regulatory specificity. *Oncogene.*  
840 2001;20(19):2438-52.
- 841 40. Kelly LM, Englmeier U, Lafon I, Sieweke MH, Graf T. MafB is an inducer of  
842 monocytic differentiation. *The EMBO journal.* 2000;19(9):1987-97.
- 843 41. Gemelli C, Montanari M, Tenedini E, Zanocco Marani T, Vignudelli T, Siena  
844 M, et al. Virally mediated MafB transduction induces the monocyte commitment of  
845 human CD34+ hematopoietic stem/progenitor cells. *Cell death and differentiation.*  
846 2006;13(10):1686-96.
- 847 42. Erceg J, Pakozdi T, Marco-Ferreres R, Ghavi-Helm Y, Girardot C, Bracken AP,  
848 et al. Dual functionality of cis-regulatory elements as developmental enhancers and  
849 Polycomb response elements. *Genes Dev.* 2017;31(6):590-602.
- 850 43. Carr TM, Wheaton JD, Houtz GM, Ciofani M. JunB promotes Th17 cell identity  
851 and restrains alternative CD4+ T-cell programs during inflammation. *Nature*  
852 *communications.* 2017;8(1):301.
- 853 44. Ogbourne S, Antalis TM. Transcriptional control and the role of silencers in  
854 transcriptional regulation in eukaryotes. *The Biochemical journal.* 1998;331 ( Pt 1):1-  
855 14.
- 856 45. Vasanthi D, Nagabhushan A, Matharu NK, Mishra RK. A functionally  
857 conserved Polycomb response element from mouse HoxD complex responds to  
858 heterochromatin factors. *Sci Rep.* 2013;3:3011.

- 859 46. Aziz A, Soucie E, Sarrazin S, Sieweke MH. MafB/c-Maf deficiency enables  
860 self-renewal of differentiated functional macrophages. *Science*. 2009;326(5954):867-  
861 71.
- 862 47. Lavin Y, Winter D, Blecher-Gonen R, David E, Keren-Shaul H, Merad M, et  
863 al. Tissue-resident macrophage enhancer landscapes are shaped by the local  
864 microenvironment. *Cell*. 2014;159(6):1312-26.
- 865 48. Joly E. Purification of DNA fragments from agarose gels using glass beads.  
866 *Methods Mol Biol*. 1996;58:237-40.
- 867 49. Huang da W, Sherman BT, Lempicki RA. Systematic and integrative analysis  
868 of large gene lists using DAVID bioinformatics resources. *Nat Protoc*. 2009;4(1):44-  
869 57.
- 870 50. Benjamini Y, Hochberg Y. Controlling the False Discovery Rate: a practical  
871 and powerful approach to multiple testing. *J Royal Stat Soc Ser B*. 1995;57(1):289-300.
- 872 51. Edgar R, Domrachev M, Lash AE. Gene Expression Omnibus: NCBI gene  
873 expression and hybridization array data repository. *Nucleic Acids Res*. 2002;30(1):207-  
874 10.
- 875 52. Robinson JT, Thorvaldsdottir H, Winckler W, Guttman M, Lander ES, Getz G,  
876 et al. Integrative genomics viewer. *Nature biotechnology*. 2011;29(1):24-6.
- 877 53. Thorvaldsdottir H, Robinson JT, Mesirov JP. Integrative Genomics Viewer  
878 (IGV): high-performance genomics data visualization and exploration. *Briefings in*  
879 *bioinformatics*. 2013;14(2):178-92.

880

## 881 **Supporting information**

882 **S1 Fig. MafK binds IRF8 in human cell-lines.** Data tracks from ENCODE (22)  
883 depicting MafK ChIP-Seq data obtained from H1-hESC, HeLa, IMR90, K562 (IRF8-  
884 restrictive cells) and GM12878 (IRF8-permissive cells) covering human IRF8 locus  
885 (hg19). Data is presented using IGV genome browser (52, 53).

886

887 **S2 Fig. MafK ChIP-PCR validation of MafK binding in IRF8 locus.** Representative  
888 gels of MafK ChIP-PCR (Ig non-specific Ab is presented as negative control) with  
889 specific PCR primers targeting each MafK binding-regions (MafK25, MafK20 and

890 MafK-int6), for validation of ChIP-seq results. Hmox1 primers are used as positive  
891 control.

892

893 **S3 Fig. MafK overexpression in NIH3T3 cells transfected with pGL3-IRF8p-Luc-**  
894 **MafK-int6.** NIH3T3 cells were transiently transfected with pGL3-IRF8p-Luc-MafK-  
895 int6 reporter construct and pMSCV-MafK. MafK expression level was measured using  
896 real-time qRT-PCR. Graph represents mean $\pm$ AvDev of n=3.

897

898 **S4 Fig. MafK expression in different cell lines.** MafK relative expression was  
899 measured using real-time qRT-PCR in IRF8-restrictive cell lines (32D, NIH3T3) and  
900 IRF8-premissive cell line (RAW).

901

902 **S5 Fig. Bach1 involvement in the repressive activity of MafK regulatory regions**  
903 **in expression- restrictive NIH3T3 cells.** (a) NIH3T3 cells were transiently transfected  
904 with pGL3-IRF8p-Luc-MafK reporter constructs and pMSCV-empty (control) or  
905 pMSCV-Bach1 over-expression vector (Bach OE). Luciferase activity was normalized  
906 to Renilla activity and total protein amount. Relative Luciferase activity was calculated  
907 as ratio between MafK construct activity and Luciferase control construct (pGL3-IRF8-  
908 Luc empty vector). \*p-value<0.05 student's t-test, n=4. (b) Bach1 overexpression was  
909 validated using real-time qRT-PCR. Graph represents mean $\pm$ AvDev of n=3.

910

911 **S6 Fig. Bach1 does not bind MafK regulatory-regions in IRF8 locus.** Representative  
912 gels of MafK and Bach1 ChIP-PCR (Ig non-specific Ab is presented as negative  
913 control) with specific PCR primers targeting each MafK binding-regions (MafK25,  
914 MafK20 and MafK-int6). Hmox1 primers are used as positive control.

915

916 **S1 Table. Primers list.** Sequences of all primers used in this study.

917

918 **S2 Table. ShRNA library screen.** Dataset of three replicates of the mouse DECIPHER  
919 pooled lentiviral shRNA library screen in IRF8-restrictive reporter cell-line NIH3T3-  
920 BACIRF8.1-GFP. Each library was normalized to 20M sequencing reads. For each  
921 shRNA construct fold change values were calculated as the ratio between GFP<sup>high</sup> and  
922 GFP<sup>low</sup> (control) read counts.

923

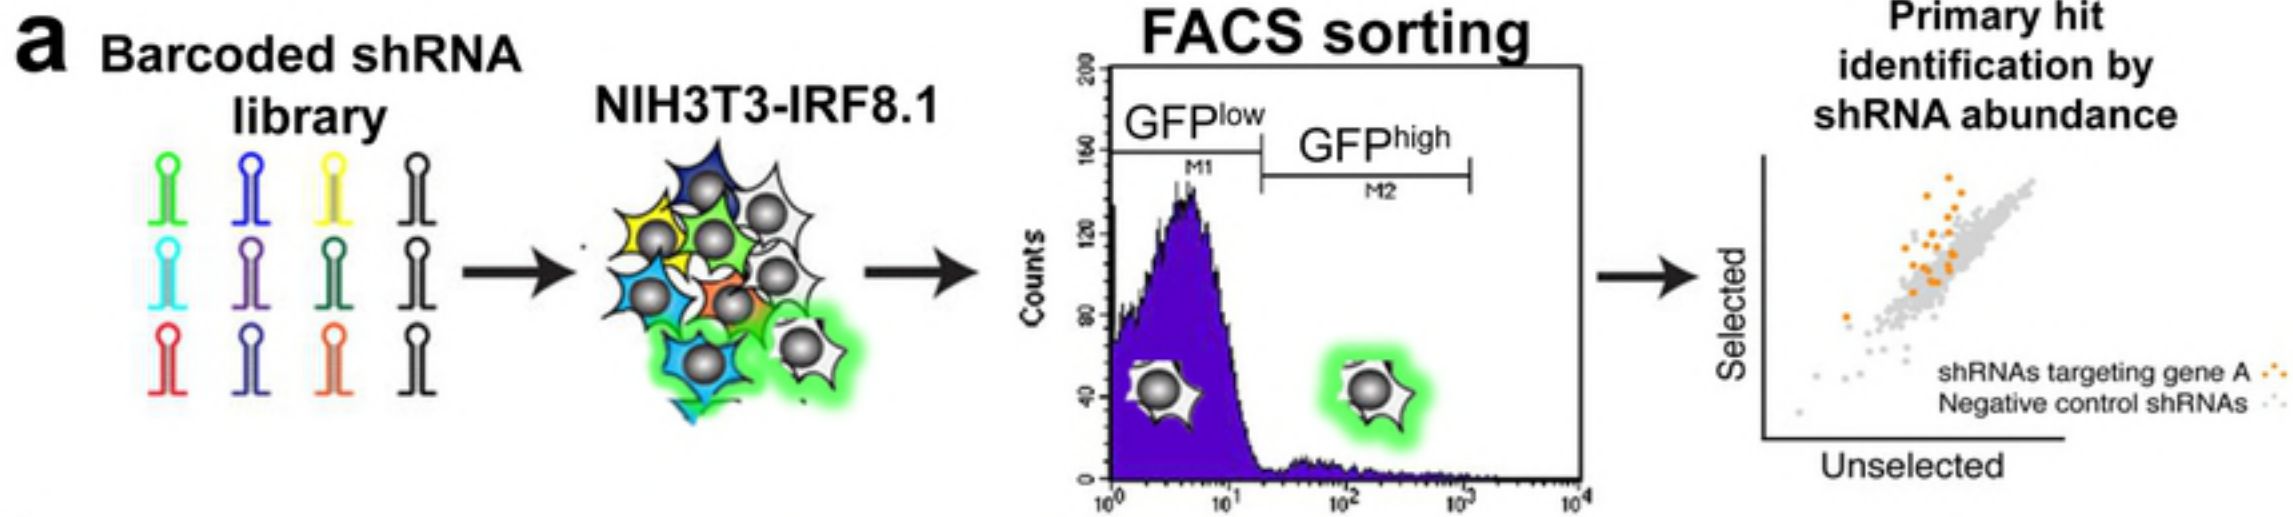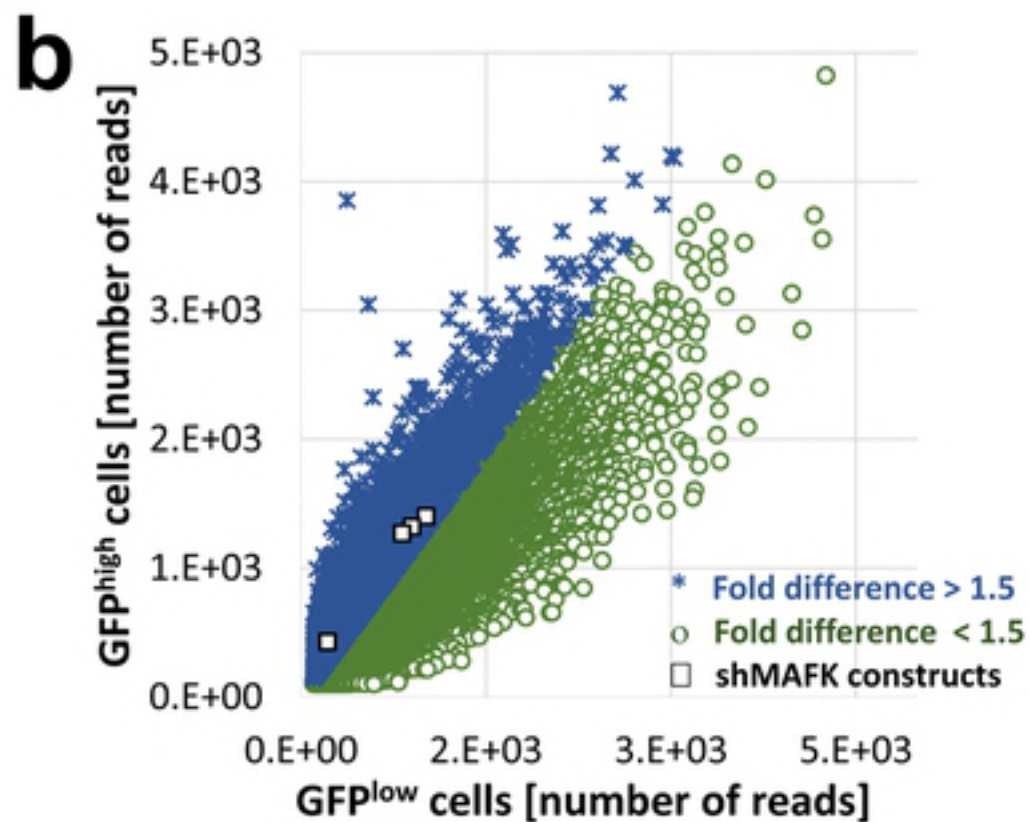

**c**

| Annotation      | Gene         | Enrichment score |
|-----------------|--------------|------------------|
| Nucleus         | Blm          | 4.55             |
|                 | Als2         | 3.29             |
|                 | Ldb1         | 3.00             |
|                 | <b>Mafk</b>  | <b>2.81</b>      |
|                 | <b>FHL2</b>  | <b>2.61</b>      |
|                 | <b>Rrm2b</b> | <b>2.49</b>      |
|                 | Pold1        | 2.36             |
|                 | Ddb1         | 2.18             |
|                 | Ager         | 2.13             |
| Plasma membrane | Scn4a        | 3.46             |
|                 | Cd82         | 2.78             |
| Cytoplasm       | Dnajc3       | 4.17             |
|                 | Pank2        | 3.08             |
|                 | Eprs         | 2.59             |
| ER membrane     | Atp4b        | 3.00             |
|                 | G6pc2        | 2.93             |
|                 | Sqle         | 2.25             |
| Control         | Actin        | 1.10             |

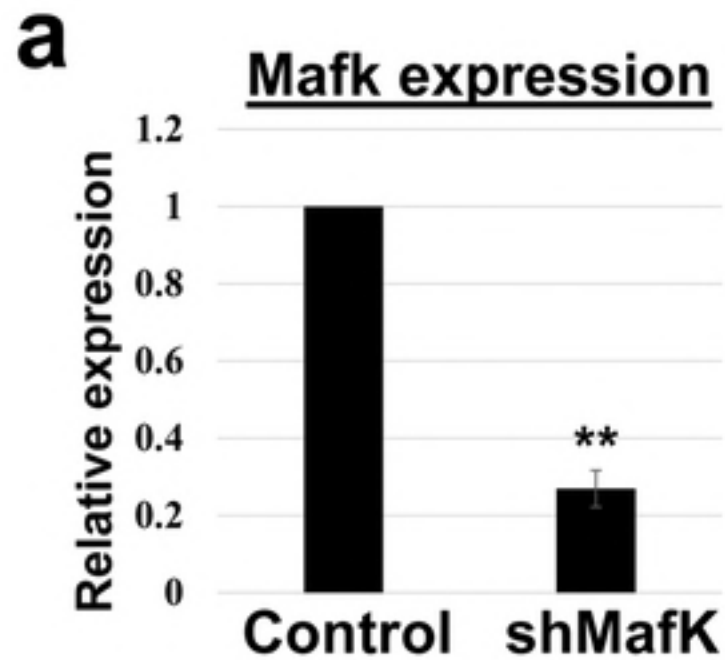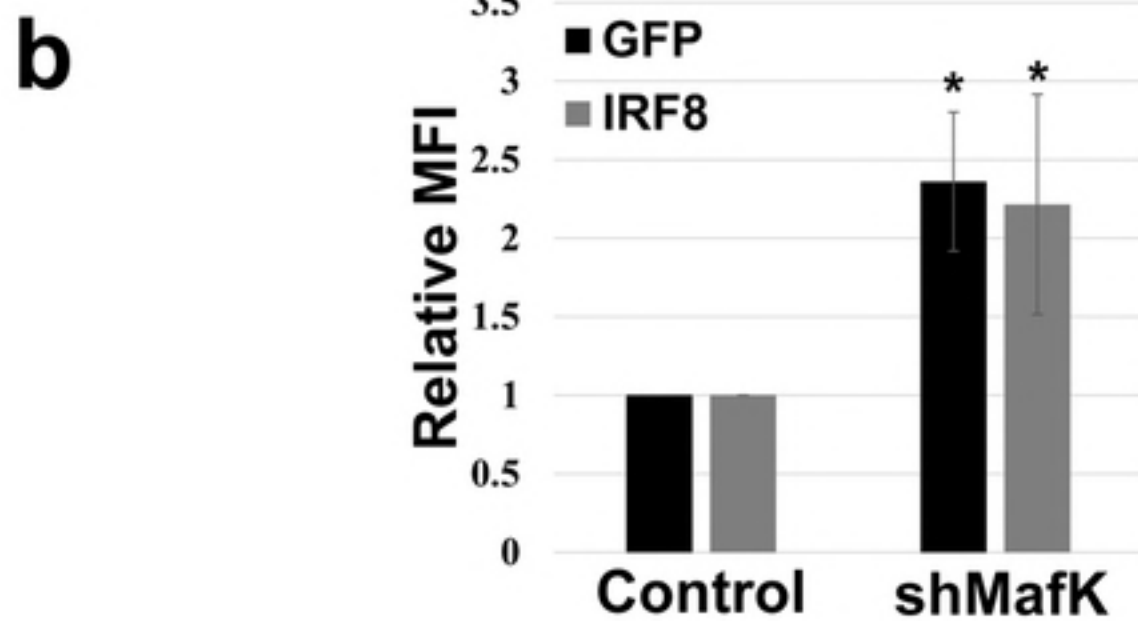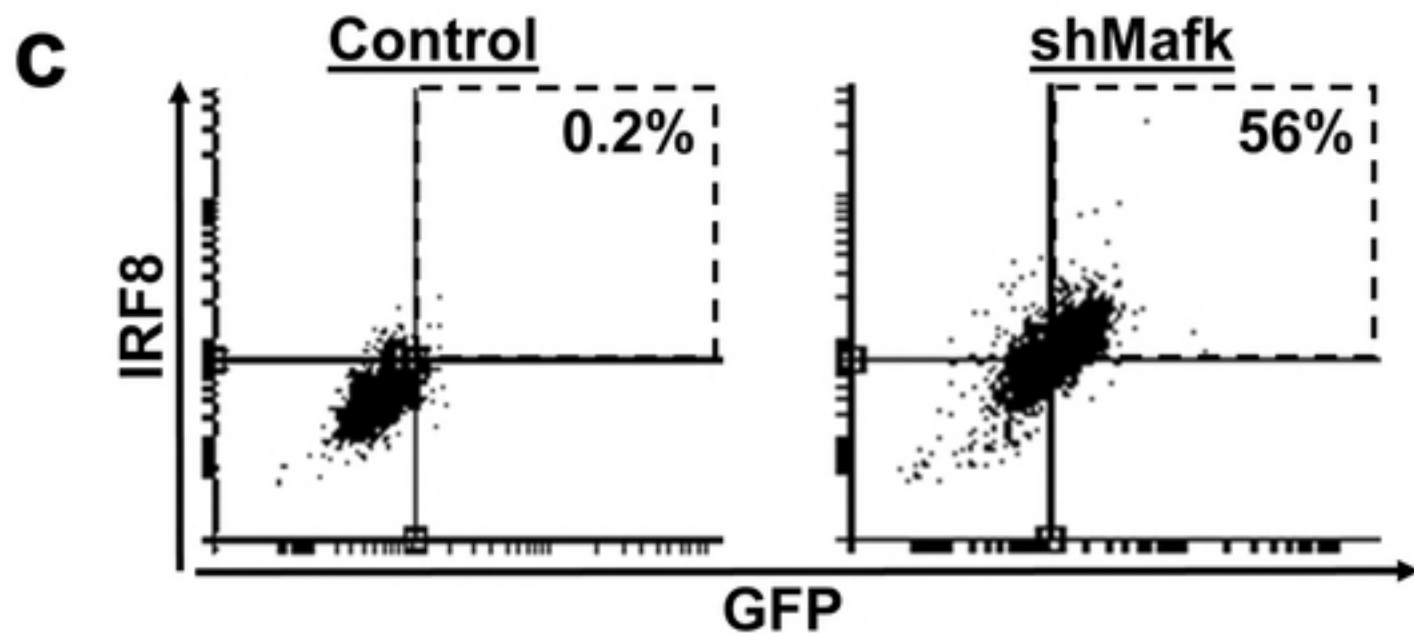



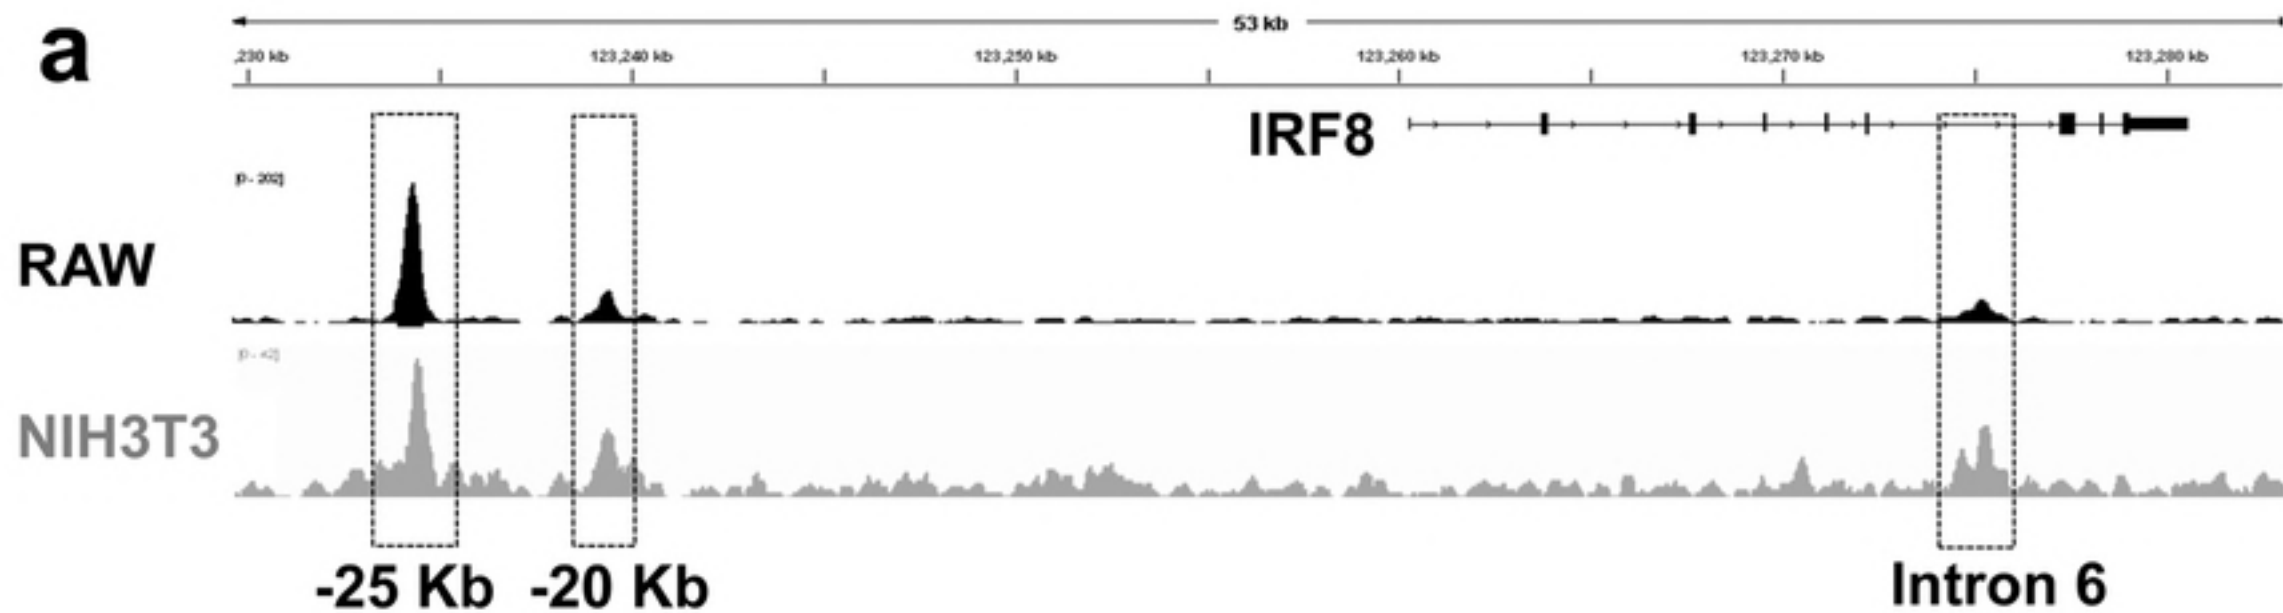

**b** MafK differential enrichment binding analysis

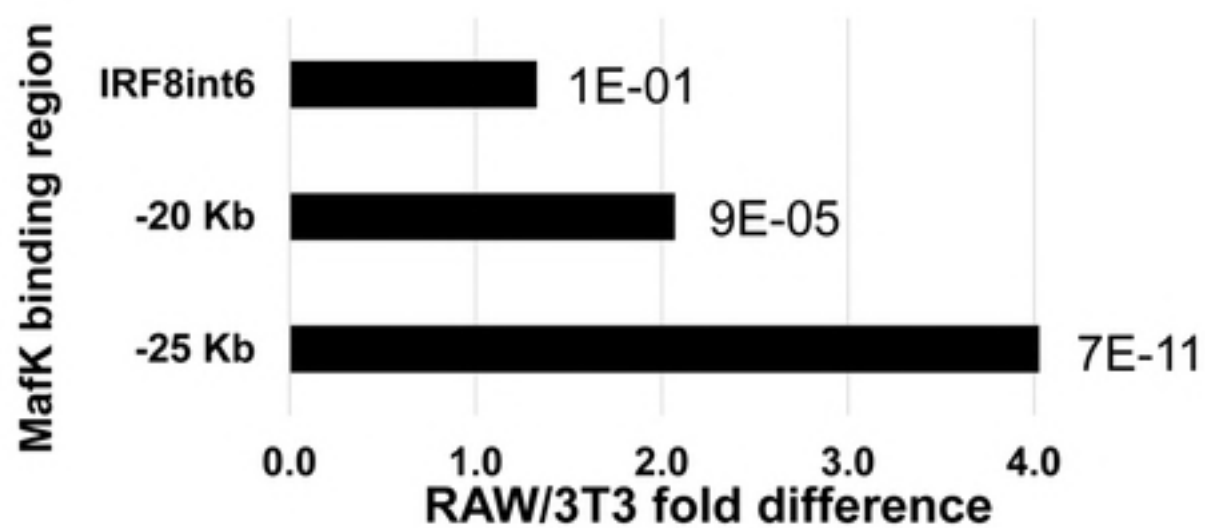

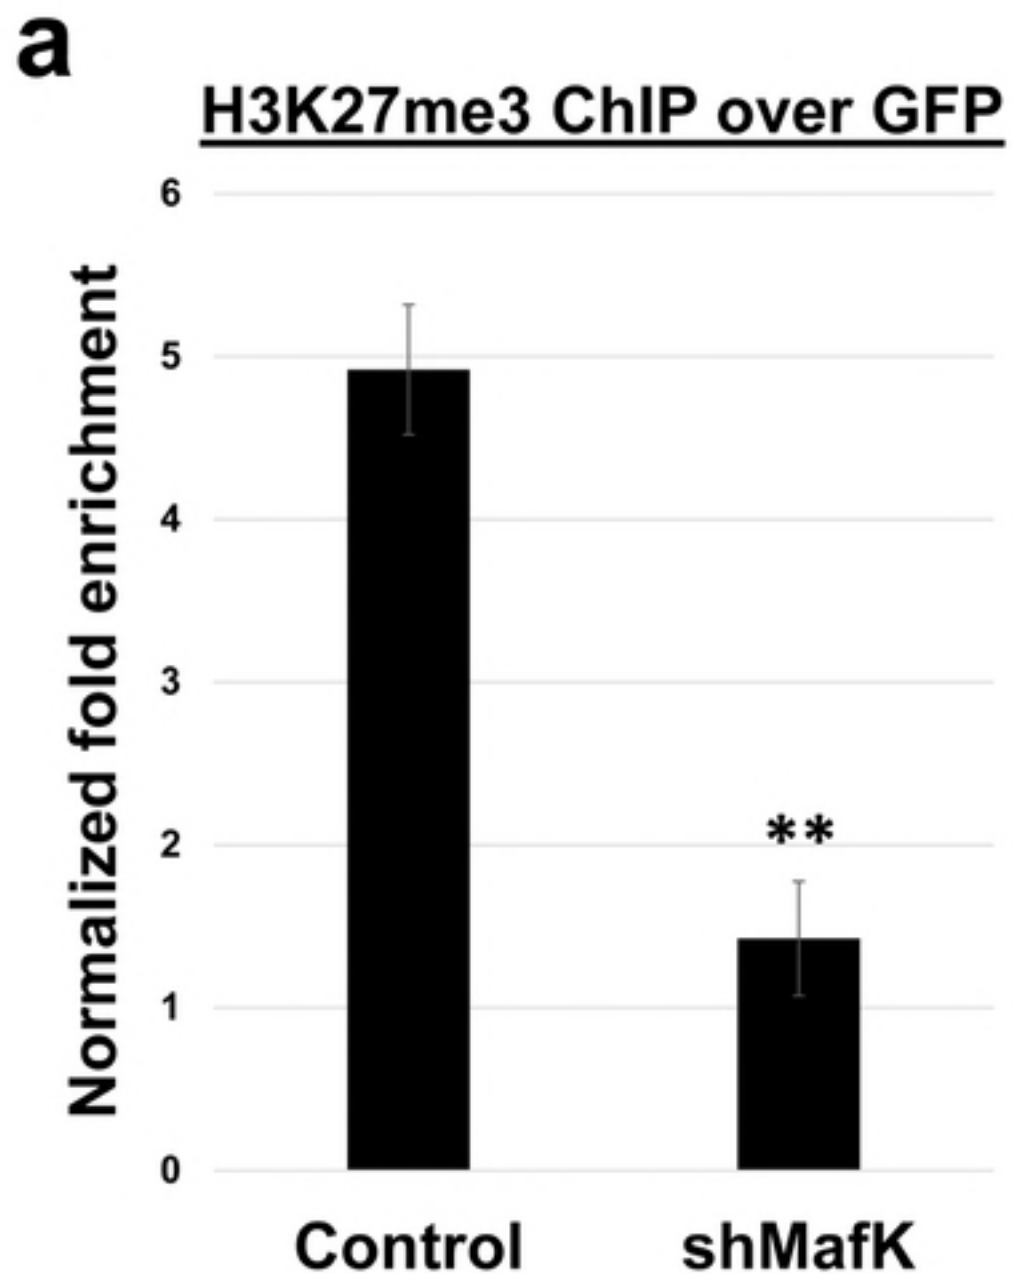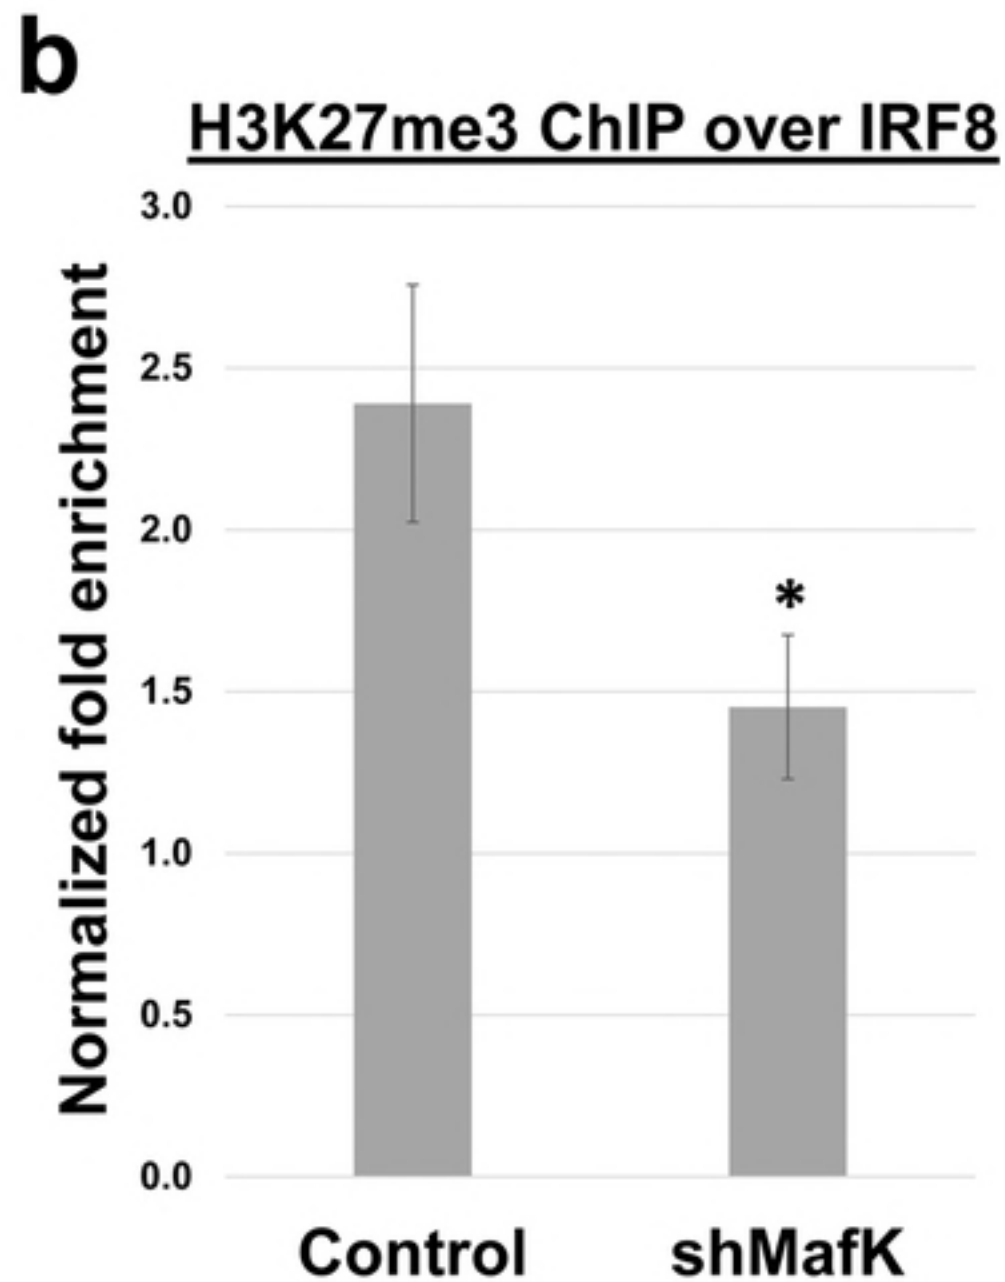

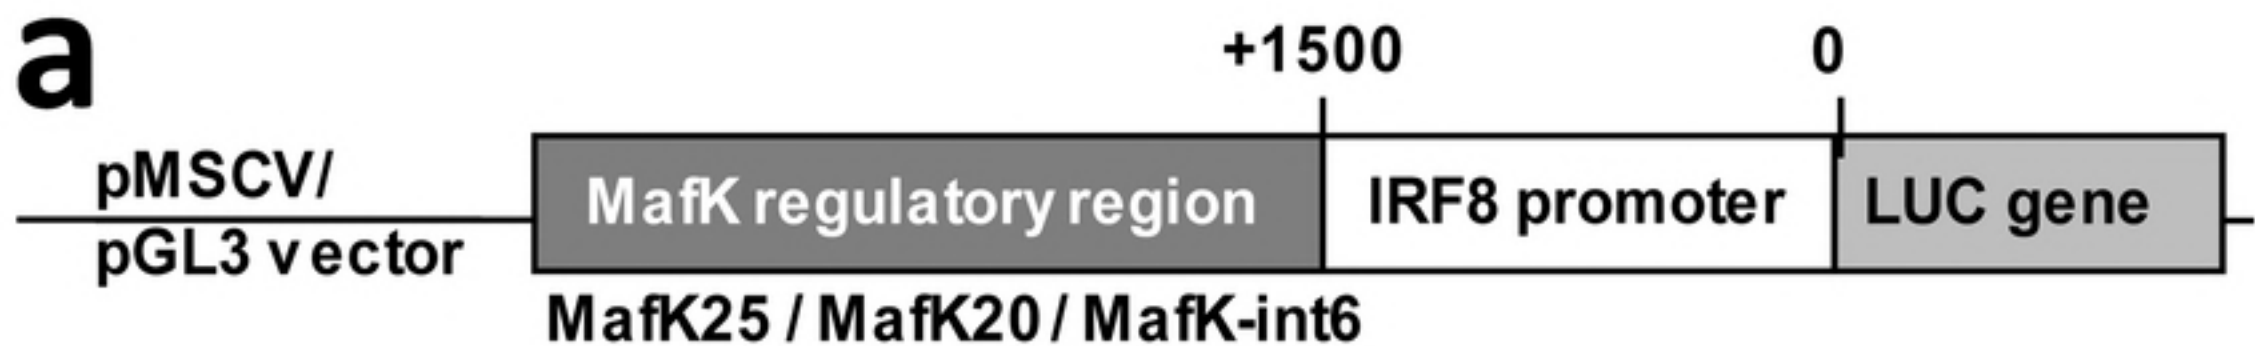

bioRxiv preprint doi: <https://doi.org/10.1101/396291>; this version posted August 20, 2018. The copyright holder for this preprint (which was not certified by peer review) is the author/funder, who has granted bioRxiv a license to display the preprint in perpetuity. It is made available under aCC-BY 4.0 International license.

**Transient pGL3-Luc**

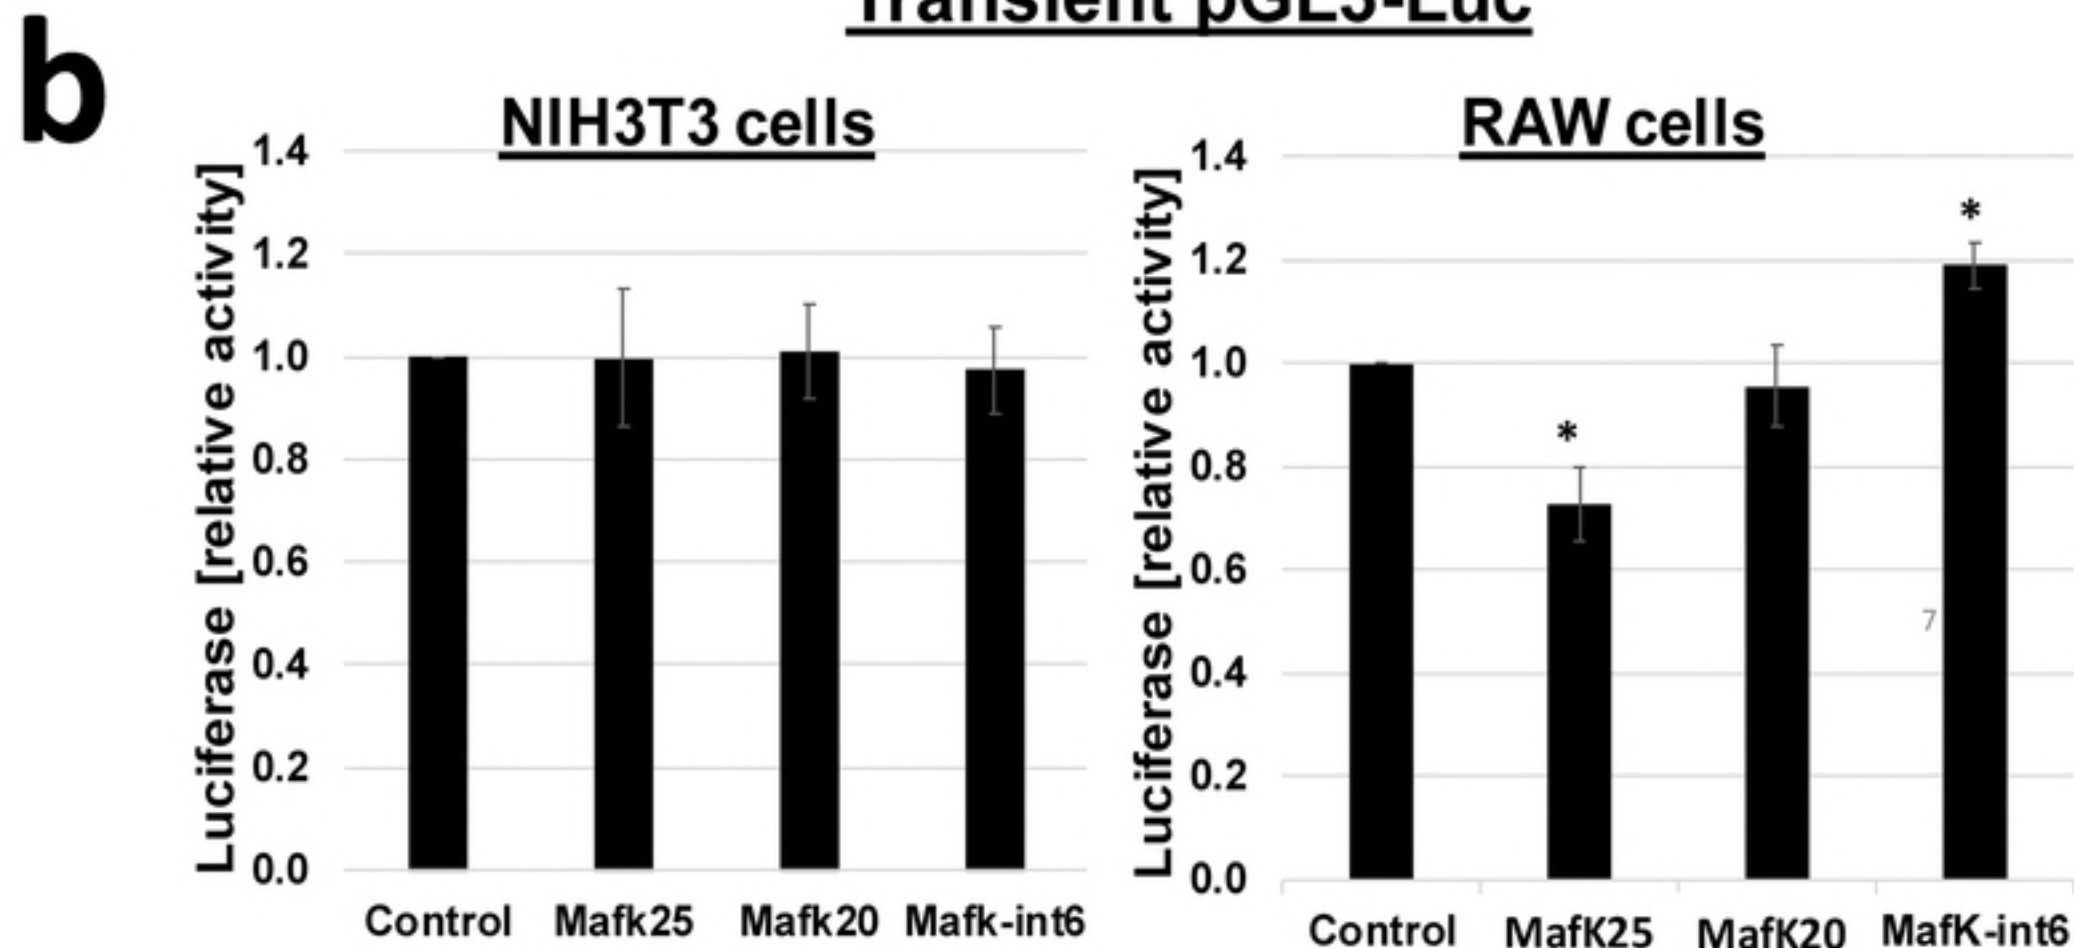

**Retroviral pMSCV-Luc**

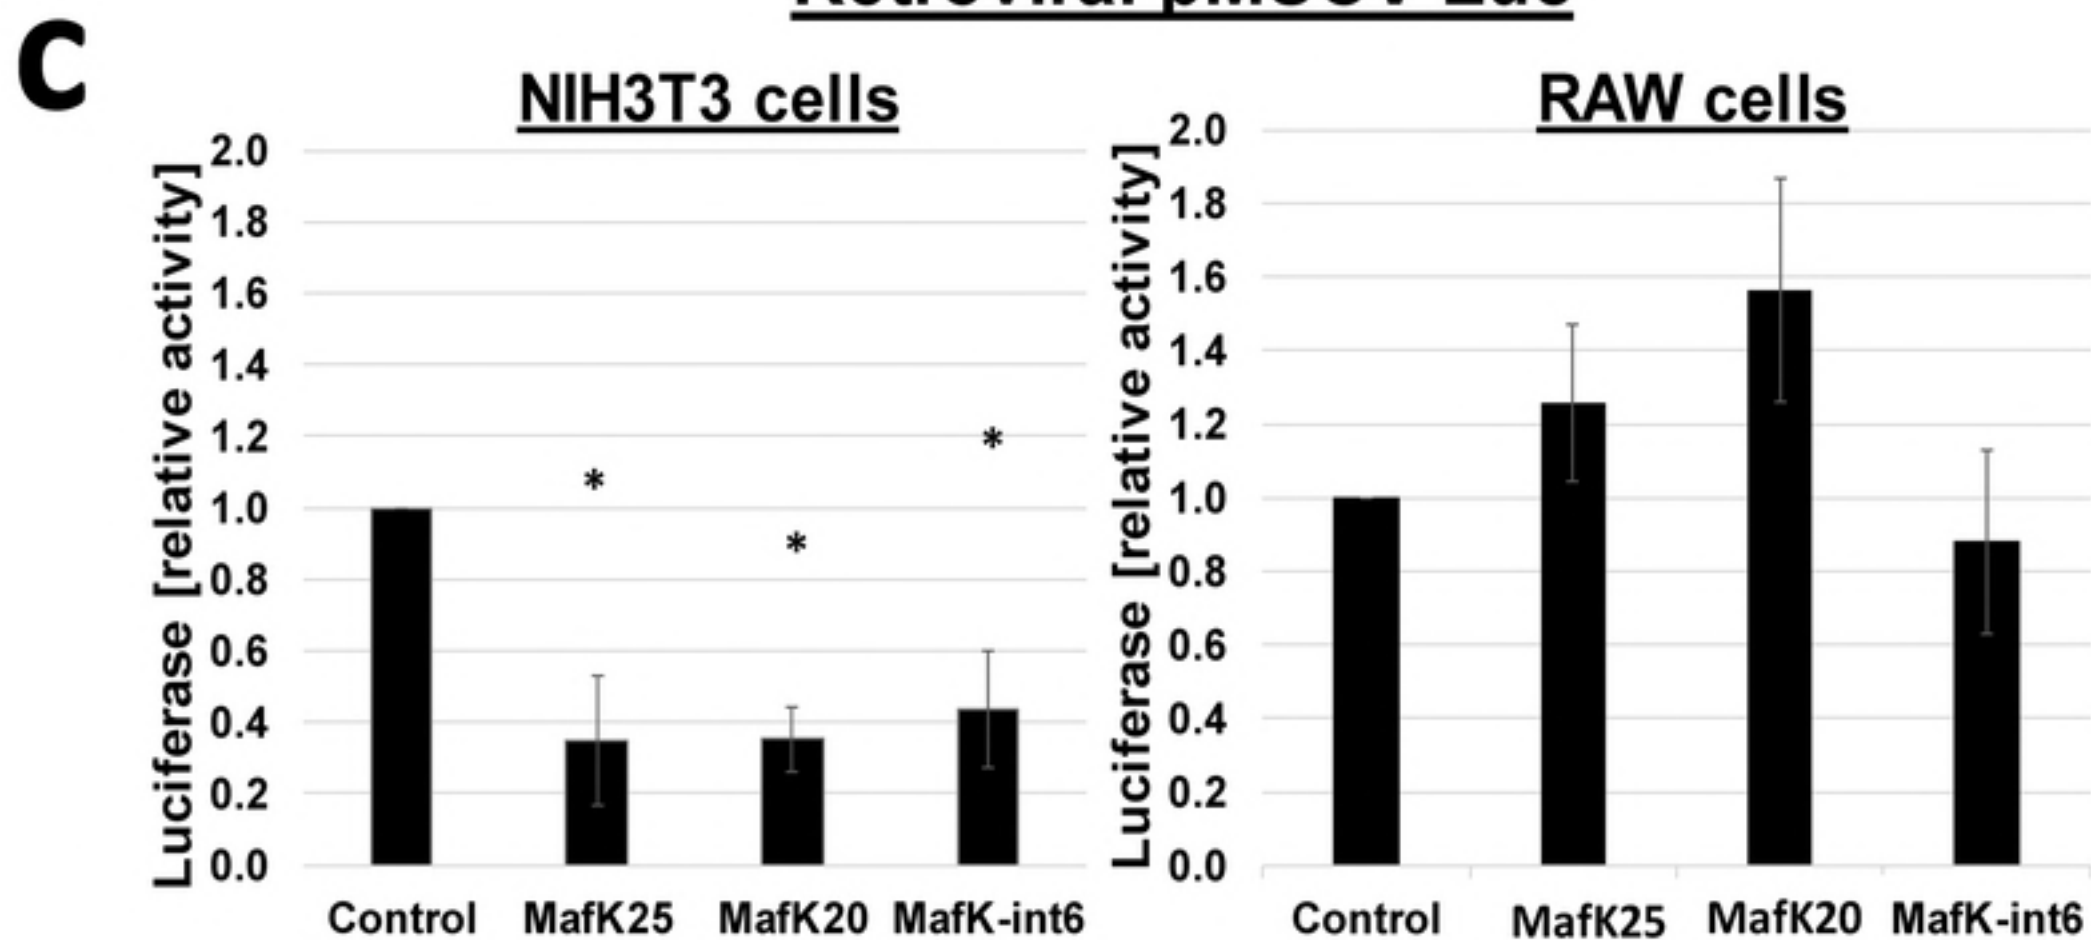

**a**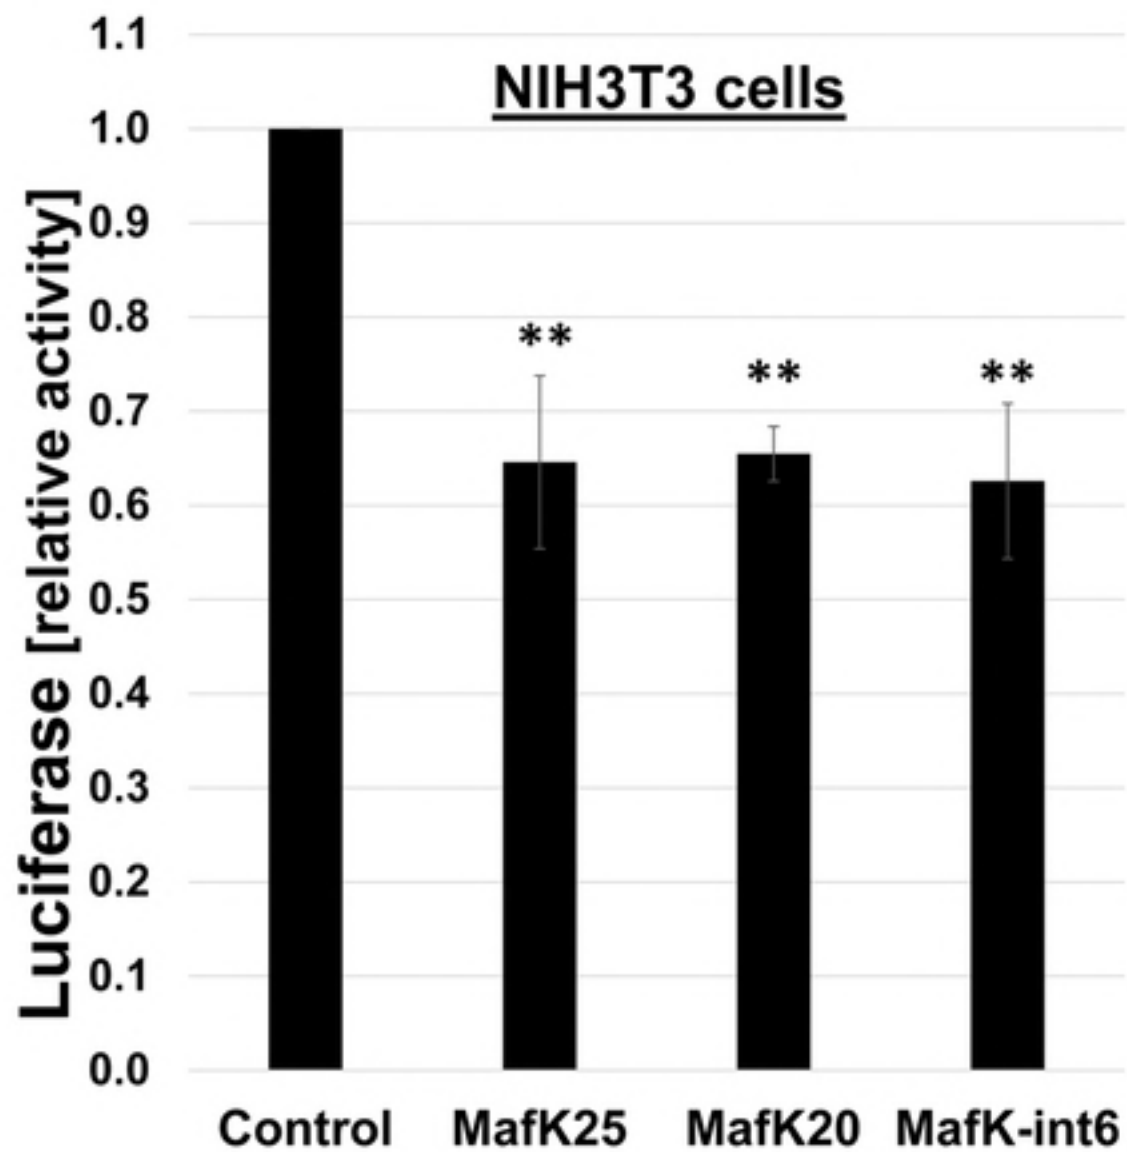**b**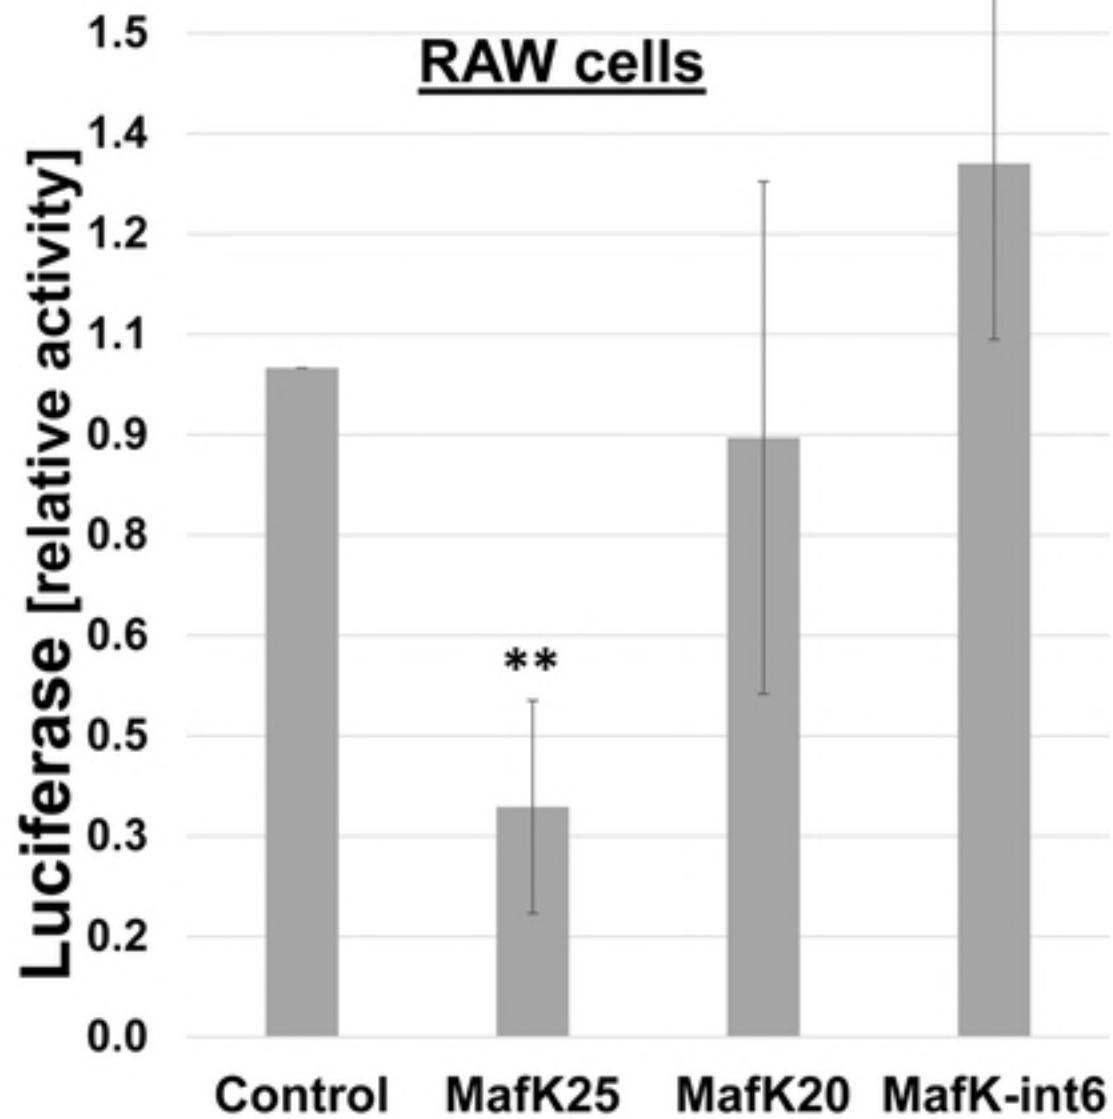

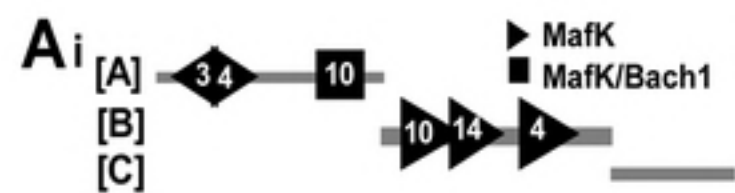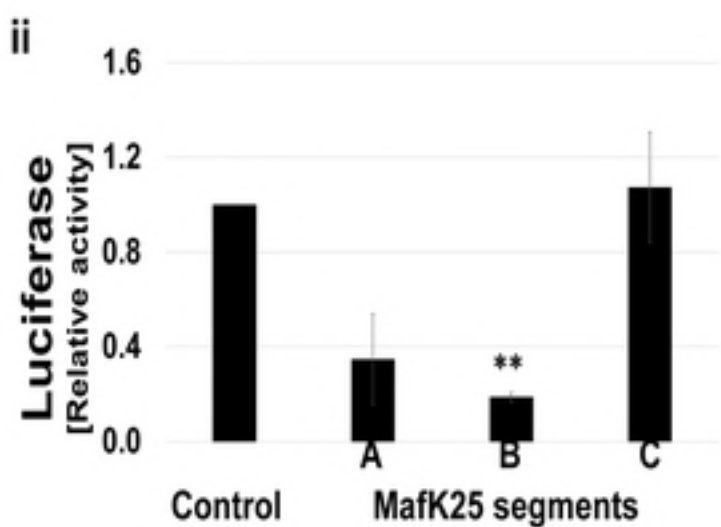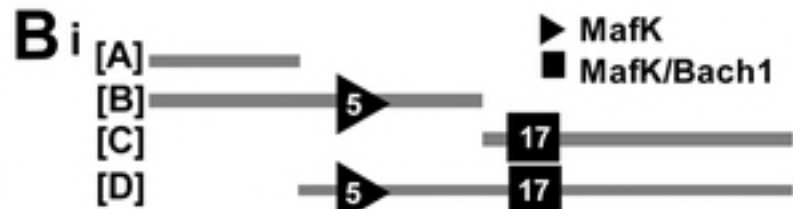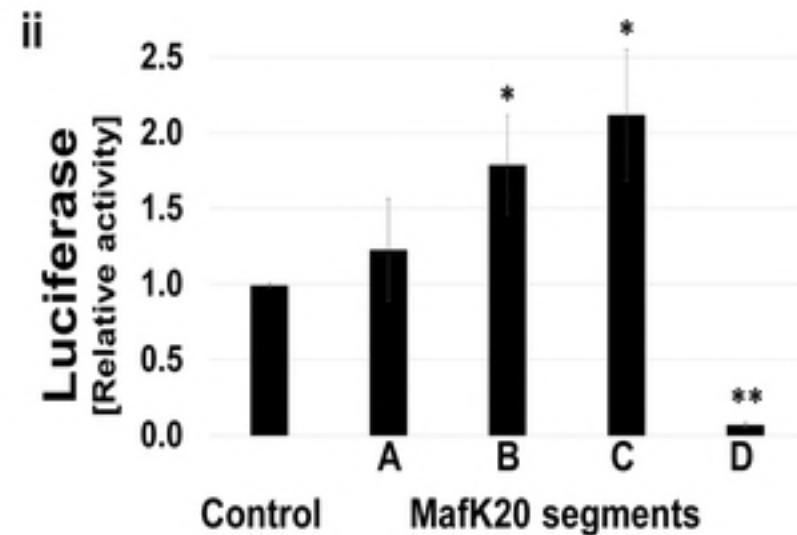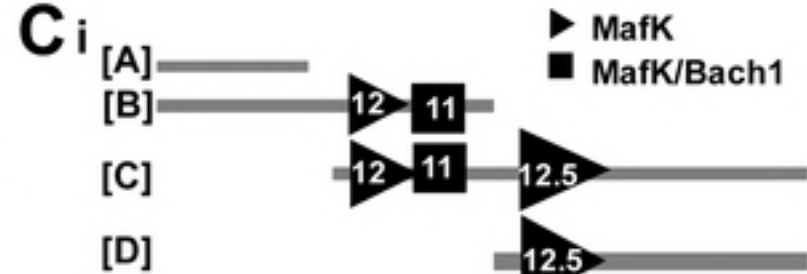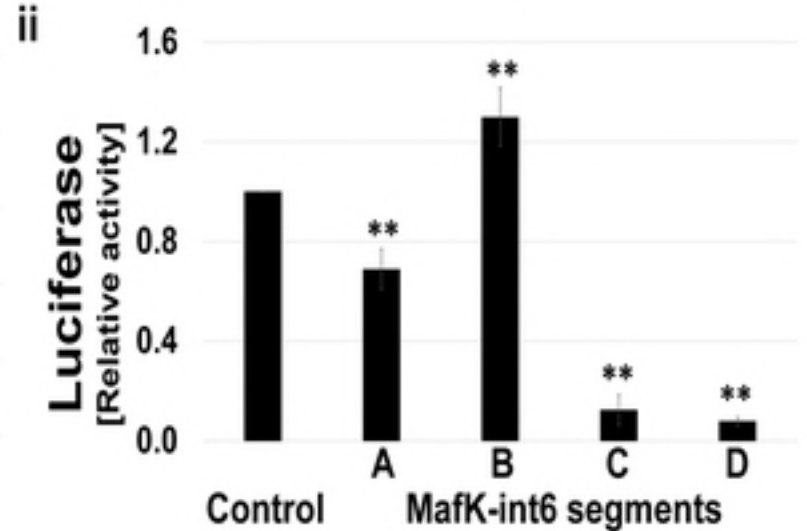

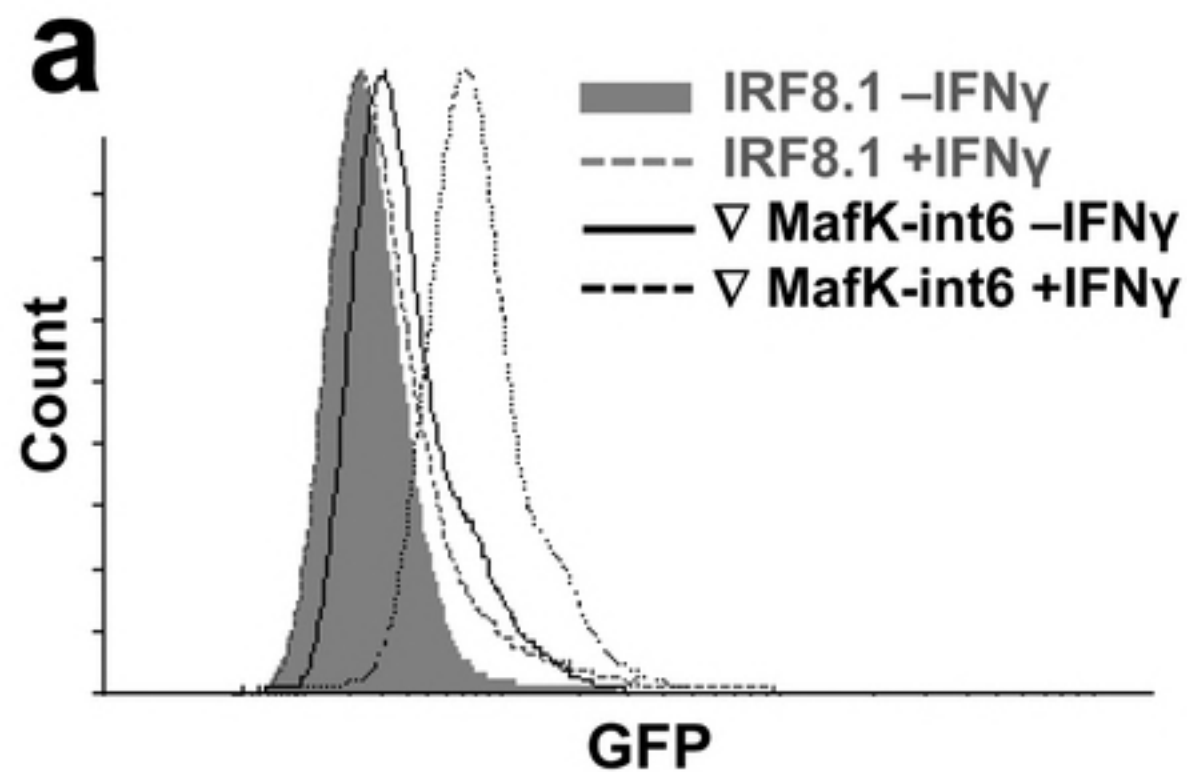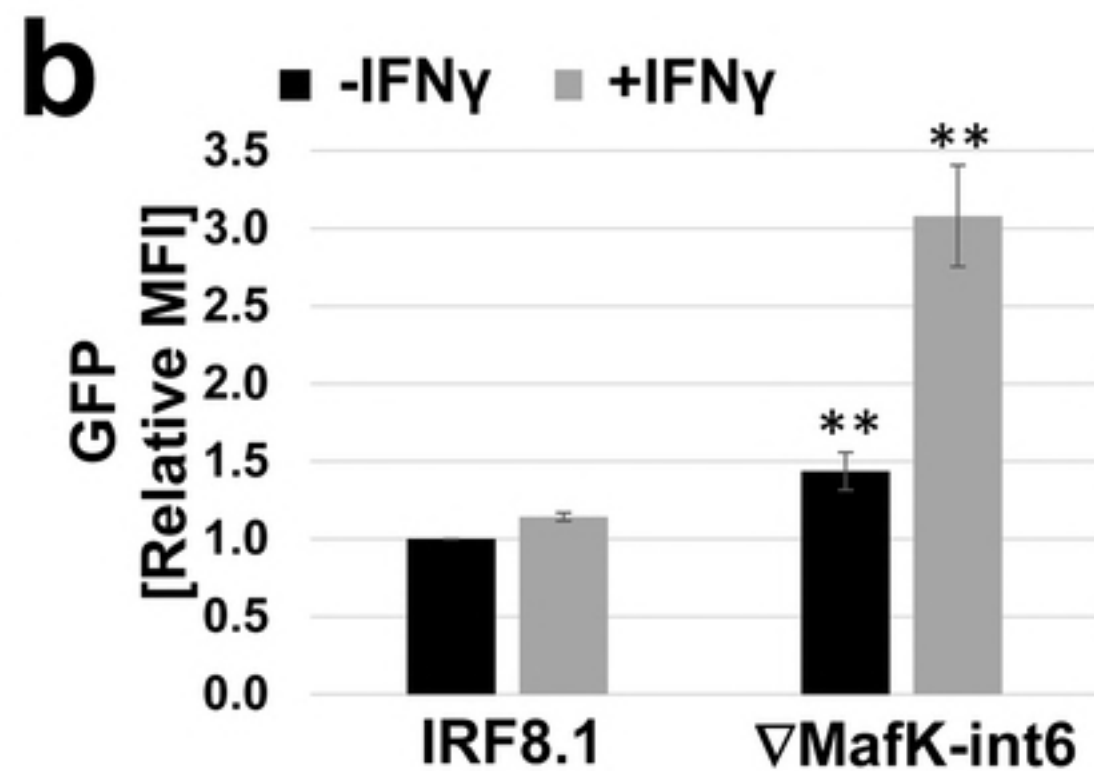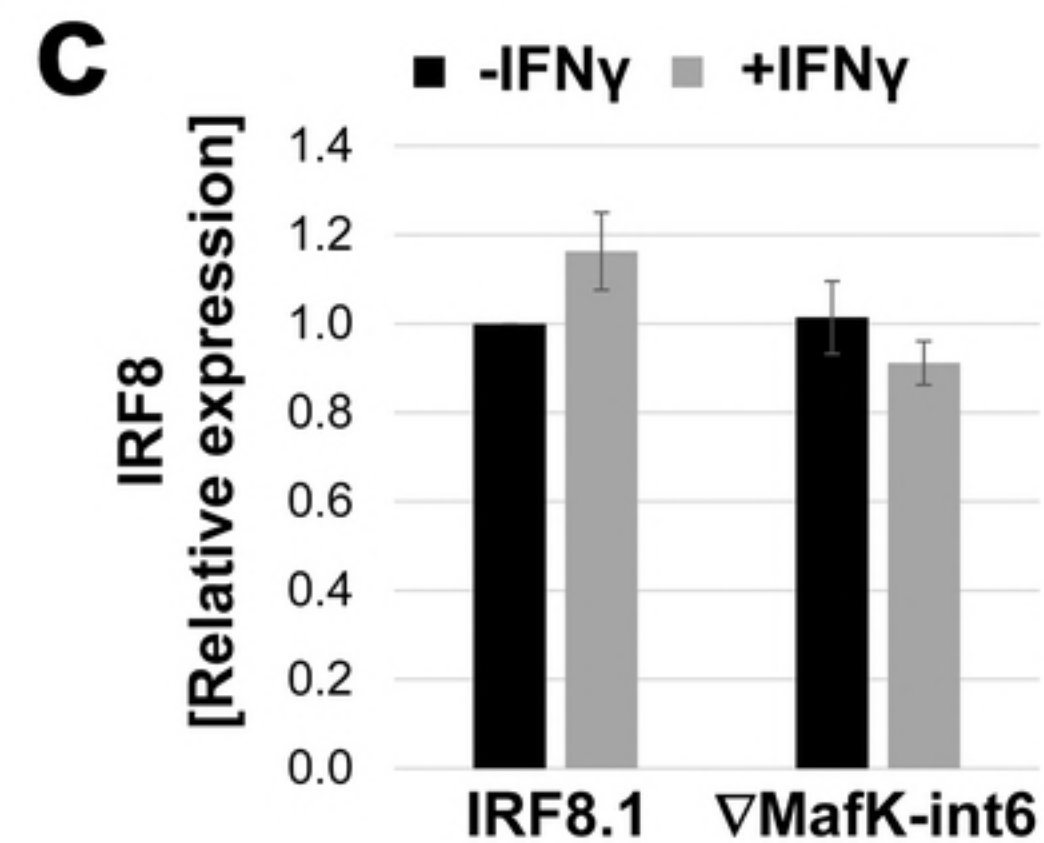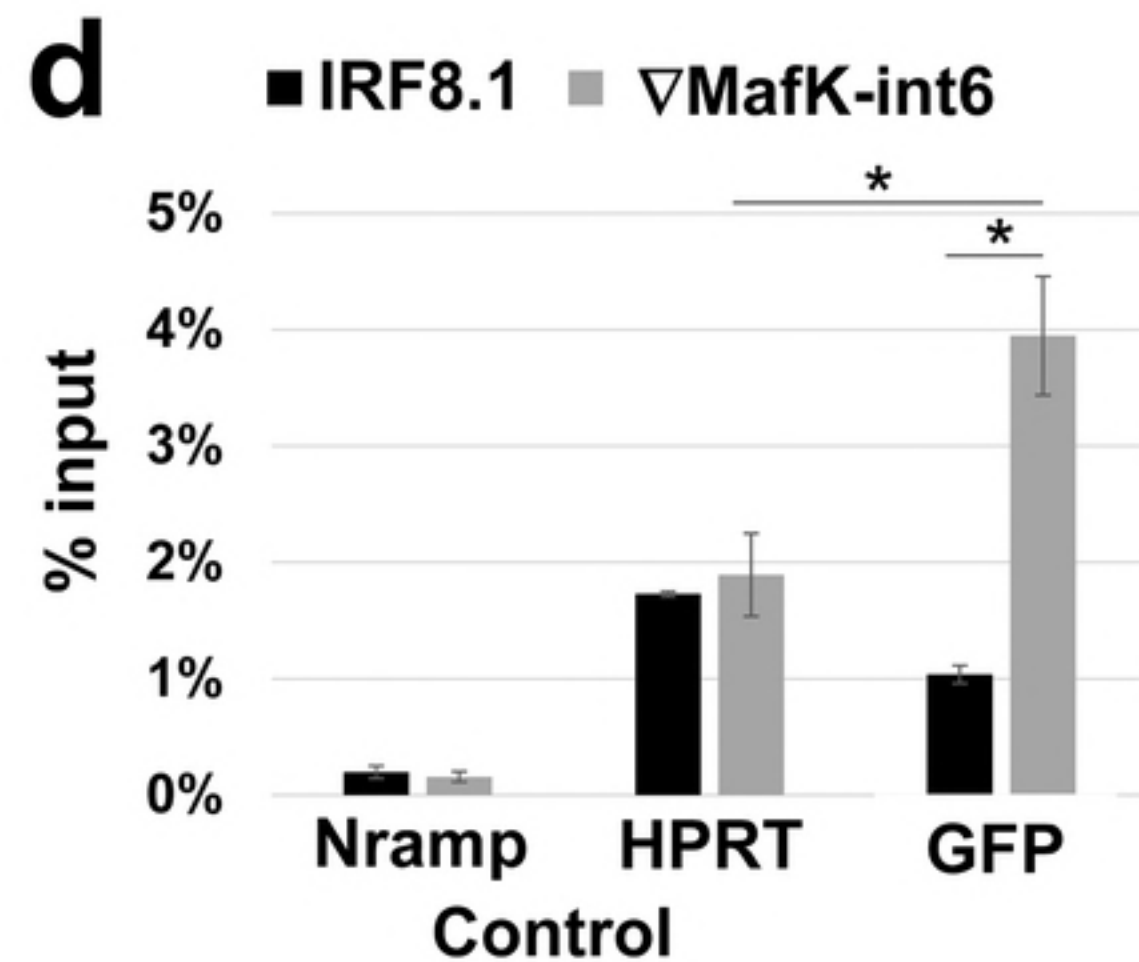

Source: http://biorxiv.org/content/10.1101/396291v1.full.pdf
